# Supplementary material for: Metal nanoparticles in “on-water” organic synthesis: one-pot nano CuO catalyzed synthesis of isoindolo[2,1-a]quinazolines
Source: Royal Society of Chemistry journal article supplement (doi:10.1039/c3ra43917h), 2013-01-01
Supplement: c3ra43917h.pdf [file c3ra43917h.pdf]

## Supporting Information

### Metal nano particle in “on-water” organic synthesis: one-pot nano CuO catalyzed synthesis of isoindolo[2,1-*a*]quinazolines

Sougata Santra, Avik Kumar Bagdi, Adinath Majee\* and Alakananda Hajra\*

Department of Chemistry, Visva-Bharati (A Central University), Santiniketan 731235, India

Tel./Fax: +913463 261526;

E-mail: [alakananda.hajra@visva-bharati.ac.in](mailto:alakananda.hajra@visva-bharati.ac.in) (A.H);

[adinath.majee@visva-bharati.ac.in](mailto:adinath.majee@visva-bharati.ac.in) (A.M)

## Table of Contents

|                                                                  |       |       |       |    |
|------------------------------------------------------------------|-------|-------|-------|----|
| General experimental methods                                     | ..... | ..... | ..... | 2  |
| Typical procedure for synthesis of compound <b>4h</b>            |       |       | ..... | 2  |
| Characterization data of compounds <b>4</b>                      |       | ..... | ..... | 2  |
| E-factor calculations                                            | ..... | ..... | ..... | 8  |
| Solvent effects                                                  | ..... | ..... | ..... | 9  |
| Reusability of the catalyst                                      | ..... | ..... | ..... | 9  |
| References                                                       | ..... | ..... | ..... | 9  |
| <sup>1</sup> H and <sup>13</sup> C NMR spectra for all compounds | ..... |       | ..... | 10 |

**General:**  $^1\text{H}$  NMR spectra were determined on a Bruker 400 (400 MHz) spectrometer as solutions in  $\text{CDCl}_3$ . Chemical shifts are expressed in parts per million ( $\delta$ ) and are referenced to tetramethylsilane (TMS) as internal standard and the signals were reported as s (singlet), d (doublet), t (triplet), m (multiplet) and coupling constants  $J$  were given in Hz.  $^{13}\text{C}$  NMR spectra were recorded at 100 MHz in  $\text{CDCl}_3$  solution. TLC was done on silica gel coated glass slide (Merck, Silica gel G for TLC). Silica gel (60-120 mesh, SRL, India) was used for column chromatography. Petroleum ether refers to the fraction boiling in the range of 60-80  $^\circ\text{C}$  unless otherwise mentioned. All solvents were dried and distilled before use. Commercially available substrates were freshly distilled before the reaction. Solvents, reagents and chemicals were purchased from Aldrich, Fluka, Merck, SRL, Spectrochem and Process Chemicals.

**Typical procedure for synthesis of 6-(2-methoxy-benzyl)-6,6a-dihydro-isoindolo[2,1-*a*]quinazoline-5,11-dione (4h)**

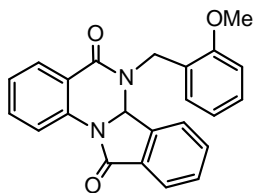

A mixture of isatoic anhydride (163 mg, 1 mmol), 2-carboxybenzaldehyde (150 mg, 1 mmol) and 2-methoxybenzyl amine (130  $\mu\text{L}$ , 137 mg, 1 mmol) was stirred in presence of CuO nano (5 mol%) in water (3 mL) under refluxed conditions for 10h (TLC). After completion, ethyl acetate (10 mL) was added to the reaction mixture. Then the insoluble CuO nanoparticles was filtered by Teflon membrane (PTFE, 0.2  $\mu\text{m}$  pore size) and the filtrate was extracted with ethylacetate (5 mL) followed by washing with brine (5 mL) and dried over  $\text{Na}_2\text{SO}_4$ . After evaporation of solvent the crude product was purified by column chromatography on silica gel using petroleum ether/ethyl acetate (4:1 to 3:1) as eluent. The CuO nanoparticles were thoroughly washed with the ethanol and reused for the next cycle. Yield: 314 mg, 85%; White solid, mp. 160-162  $^\circ\text{C}$ ; IR (KBr): 3024, 1959, 1716, 1656, 1476  $\text{cm}^{-1}$ ;  $^1\text{H}$  NMR (400 MHz,  $\text{CDCl}_3$ ):  $\delta$  8.21 (d,  $J = 7.6$  Hz, 1H), 8.15 (d,  $J = 8$  Hz, 1H), 7.96 (d,  $J = 7.6$  Hz, 1H), 7.67-7.51 (m, 3H), 7.42-7.36 (m, 2H), 7.23-7.21 (m, 1H), 7.10 (d,  $J = 7.6$  Hz, 1H), 6.92-6.88 (m, 2H), 6.38 (s, 1H), 5.24 (d,  $J = 17.2$  Hz, 1H), 4.84 (d,  $J = 17.6$  Hz, 1H), 3.89 (s, 3H);  $^{13}\text{C}$  NMR (100 MHz,  $\text{CDCl}_3$ ):  $\delta$  165.1, 164.2, 156.5, 138.0, 137.0, 133.6, 132.6, 132.5, 130.5, 129.4, 128.3, 127.1, 125.4, 125.3, 124.8, 124.4, 120.9, 120.5, 120.2, 110.5, 70.9, 55.4, 42.4.

Anal. Calcd. for  $C_{23}H_{18}N_2O_3$ : C, 74.58; H, 4.90; N, 7.56%;. Found: C, 74.51; H, 4.82; N, 7.52%.

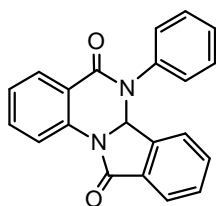

**6-phenyl-6,6a-dihydroisoindolo[2,1-a]quinazoline-5,11-dione (4a)<sup>1</sup>**

Yield: 280 mg, 86%; White solid, mp. 184-186 °C; IR (KBr): 3029, 1963, 1721, 1658, 1468  $cm^{-1}$ ;  $^1H$  NMR (400 MHz,  $CDCl_3$ ):  $\delta$  8.10-8.09 (m, 2H), 7.84 (d,  $J = 7.6$  Hz, 1H), 7.63-7.55 (m, 2H), 7.53-7.29 (m, 5H), 7.26-7.22 (m, 1H), 7.16-7.13 (m, 1H), 6.44 (s, 1H), 6.04 (d,  $J = 7.6$  Hz, 1H);  $^{13}C$  NMR (100 MHz,  $CDCl_3$ ):  $\delta$  165.5, 164.3, 138.8, 138.3, 137.2, 134.0, 132.3, 132.2, 130.4, 129.9, 129.5, 129.3, 125.5, 125.4, 124.6, 120.4, 120.3, 120.2, 72.1.

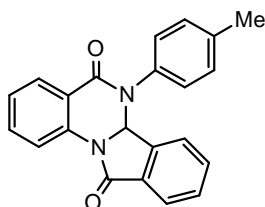

**6-p-Tolyl-6,6a-dihydro-isoindolo[2,1-a]quinazoline-5,11-dione (4b)<sup>2</sup>**

Yield: 285 mg, 84%; Gummy mass; IR (KBr): 3015, 1718, 1655, 1472  $cm^{-1}$ ;  $^1H$  NMR (400 MHz,  $CDCl_3$ ):  $\delta$  8.12-8.09 (m, 2H), 7.86 (d,  $J = 7.6$  Hz, 1H), 7.61-7.41 (m, 4H), 7.28-7.18 (m, 4H), 6.42 (s, 1H), 6.13 (d,  $J = 7.2$  Hz, 1H), 2.35 (s, 3H);  $^{13}C$  NMR (100 MHz,  $CDCl_3$ ):  $\delta$  165.3, 164.2, 139.0, 138.7, 137.0, 135.3, 134.3, 133.8, 132.1, 132.0, 130.3, 130.1, 129.6, 129.4, 125.4, 125.2, 124.3, 120.2, 72.2, 21.3.

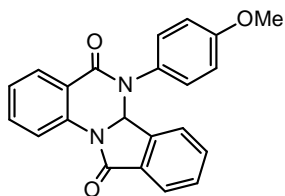

**6-(4-Methoxy-phenyl)-6,6a-dihydro-isoindolo[2,1-a]quinazoline-5,11-dione (4c)**

Yield: 285 mg, 80%; White solid, mp. 141-143 °C; IR (KBr): 3033, 1967, 1717, 1661, 1482  $\text{cm}^{-1}$ ;  $^1\text{H}$  NMR (400 MHz,  $\text{CDCl}_3$ ):  $\delta$  8.04-8.01 (m, 2H), 7.80 (d,  $J = 7.2$  Hz, 1H), 7.54-7.49 (m, 1H), 7.41-7.32 (m, 2H), 7.20-7.14 (m, 2H), 6.95-6.50 (m, 3H), 6.35 (s, 1H), 6.10 (d,  $J = 8$  Hz, 1H), 3.72 (s, 3H);  $^{13}\text{C}$  NMR (100 MHz,  $\text{CDCl}_3$ ):  $\delta$  165.1, 164.2, 159.6, 138.6, 136.9, 133.6, 132.0, 131.9, 130.6, 130.0, 129.2, 125.4, 125.0, 124.2, 120.2, 120.0, 114.9, 114.5, 72.2, 55.4. Anal. Calcd. for  $\text{C}_{22}\text{H}_{16}\text{N}_2\text{O}_3$ : C, 74.15; H, 4.53; N, 7.86%;. Found: C, 74.07; H, 4.42; N, 7.77%.

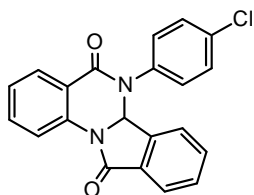

**6-(4-Chloro-phenyl)-6,6a-dihydro-isoindolo[2,1-a]quinazoline-5,11-dione (4d)<sup>2</sup>**

Yield: 280 mg, 78%; White solid, mp. 186-188 °C; IR (KBr): 3021, 1954, 1718, 1656, 1479  $\text{cm}^{-1}$ ;  $^1\text{H}$  NMR (400 MHz,  $\text{CDCl}_3$ ):  $\delta$  8.19-8.15 (m, 2H), 7.97 (d,  $J = 7.6$  Hz, 1H), 7.70-7.66 (m, 1H), 7.64-7.50 (m, 3H), 7.42-7.32 (m, 4H), 6.51 (s, 1H), 6.28 (d,  $J = 8$  Hz, 1H);  $^{13}\text{C}$  NMR (100 MHz,  $\text{CDCl}_3$ ):  $\delta$  165.4, 164.4, 138.5, 137.3, 136.8, 135.2, 134.3, 132.5, 132.3, 130.6, 130.1, 129.6, 129.5, 125.5, 124.8, 120.5, 120.2, 120.1, 72.3.

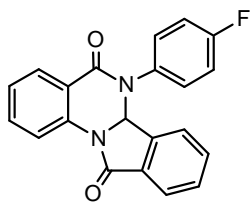

**6-(4-Fluoro-phenyl)-6,6a-dihydro-isoindolo[2,1-a]quinazoline-5,11-dione (4e)**

Yield: 258 mg, 75%; Gummy mass; IR (KBr): 3027, 1951, 1718, 1659, 1477  $\text{cm}^{-1}$ ;  $^1\text{H}$  NMR (400 MHz,  $\text{CDCl}_3$ ):  $\delta$  8.18-8.13 (m, 2H), 7.98 (d,  $J = 7.6$  Hz, 1H), 7.72-7.68 (m, 1H), 7.59-7.53 (m, 2H), 7.39-7.32 (m, 3H), 7.08-6.74 (m, 2H), 6.51 (s, 1H), 6.24 (d,  $J = 7.6$  Hz, 1H);  $^{13}\text{C}$  NMR (100 MHz,  $\text{CDCl}_3$ ):  $\delta$  165.1, 164.2, 162.5 (d,  $^1J_{\text{C-F}} = 247$  Hz), 138.4, 137.0, 134.0, 133.9 (d,  $^4J_{\text{C-F}} = 3$  Hz), 132.2, 132.0, 130.3, 129.4, 125.2 (d,  $^3J_{\text{C-F}} = 6$  Hz), 124.6, 120.3, 120.0, 116.8, 116.5, 115.7 (d,  $^2J_{\text{C-F}} = 21$  Hz), 72.2; Anal. Calcd. for  $\text{C}_{21}\text{H}_{13}\text{FN}_2\text{O}_2$ : C, 73.25; H, 3.81; N, 8.14%;. Found: C, 73.17; H, 3.76; N, 8.07%.

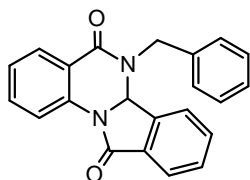

**6-Benzyl-6,6a-dihydro-isoindolo[2,1-a]quinazoline-5,11-dione (4f).<sup>1</sup>**

Yield: 282 mg, 83%; White solid, mp. 154-156  $^{\circ}\text{C}$ ; IR (KBr): 3024, 1956, 1715, 1660, 1482  $\text{cm}^{-1}$ ;  $^1\text{H}$  NMR (400 MHz,  $\text{CDCl}_3$ ):  $\delta$  8.13 (d,  $J = 7.6$  Hz, 1H), 8.04 (d,  $J = 8$  Hz, 1H), 7.88 (d,  $J = 6.8$  Hz, 1H), 7.87-7.44 (m, 3H), 7.34-7.11 (m, 7H), 6.27 (s, 1H), 5.42 (d,  $J = 16.4$  Hz, 1H), 4.54 (d,  $J = 16.4$  Hz, 1H);  $^{13}\text{C}$  NMR (100 MHz,  $\text{CDCl}_3$ ):  $\delta$  164.8, 164.1, 137.6, 136.8, 136.1, 133.7, 132.6, 132.5, 130.5, 129.4, 129.0, 127.2, 126.2, 125.4, 125.3, 124.9, 120.1, 120.0, 70.6, 46.6.

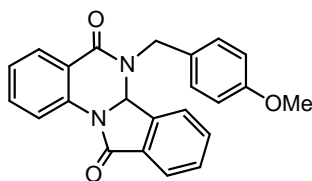

**6-(4-Methoxy-benzyl)-6,6a-dihydro-isoindolo[2,1-a]quinazoline-5,11-dione (4g).<sup>1</sup>**

Yield: 314 mg, 85%; White solid, mp. 143-145 °C; IR (KBr): 3028, 1959, 1718, 1656 cm<sup>-1</sup>; <sup>1</sup>H NMR (400 MHz, CDCl<sub>3</sub>): δ 8.09 (dd, *J*<sub>1</sub> = 7.6 Hz, *J*<sub>2</sub> = 1.2 Hz, 1H), 8.00 (d, *J* = 8 Hz, 1H), 7.85 (d, *J* = 6.8 Hz, 1H), 7.56-7.23 (m, 5H), 7.01 (d, *J* = 8.8 Hz, 2H), 6.76 (d, *J* = 6.8 Hz, 2H), 6.21 (s, 1H), 5.30 (d, *J* = 16.4 Hz, 1H), 4.44 (d, *J* = 16.4 Hz, 1H), 3.67 (s, 3H); <sup>13</sup>C NMR (100 MHz, CDCl<sub>3</sub>): δ 164.9, 164.2, 158.7, 137.7, 136.8, 133.7, 132.6, 130.6, 129.8, 129.4, 128.0, 127.6, 125.5, 125.3, 125.0, 120.3, 120.2, 114.4, 70.7, 55.3, 46.1.

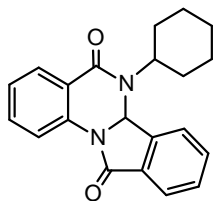

**6-Cyclohexyl-6,6a-dihydro-isoindolo[2,1-a]quinazoline-5,11-dione (4i).<sup>1</sup>**

Yield: 252 mg, 76%; White solid, mp. 150-152 °C; IR (KBr): 3021, 1717, 1659, 1468 cm<sup>-1</sup>; <sup>1</sup>H NMR (400 MHz, CDCl<sub>3</sub>): δ 7.94 (d, *J* = 7.6 Hz, 1H), 7.77-7.62 (m, 2H), 7.48-7.41 (m, 2H), 7.32-7.28 (m, 1H), 6.92-6.83 (m, 2H), 6.02 (d, *J* = 7.2 Hz, 1H), 3.89-3.82 (m, 1H), 1.99-1.38 (m, 5H), 1.26-1.16 (m, 5H); <sup>13</sup>C NMR (100 MHz, CDCl<sub>3</sub>): δ 169.4, 168.2, 146.0, 145.4, 134.6, 132.8, 130.6, 127.8, 127.0, 125.6, 123.1, 118.9, 117.7, 114.1, 86.2, 48.5, 33.1, 25.5, 24.8.

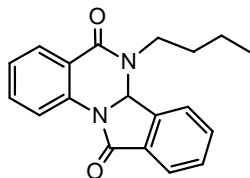

**6-Butyl-6,6a-dihydro-isoindolo[2,1-a]quinazoline-5,11-dione (4j)**

Yield: 251 mg, 82%; White solid, mp. 158-160 °C; IR (KBr): 3022, 1965, 1714, 1660, 1452  $\text{cm}^{-1}$ ;  $^1\text{H}$  NMR (400 MHz,  $\text{CDCl}_3$ ):  $\delta$  8.14-8.02 (m, 3H), 7.74-7.65 (m, 3H), 7.63-7.59 (m, 1H), 7.34-7.28 (m, 1H), 6.23 (s, 1H), 3.92-3.86 (m, 1H), 3.73-3.67 (m, 1H), 1.59-1.31 (m, 4H), 0.92 (t,  $J = 7.6$  Hz, 3H);  $^{13}\text{C}$  NMR (100 MHz,  $\text{CDCl}_3$ ):  $\delta$  164.7, 163.5, 138.1, 136.5, 133.2, 132.8, 132.6, 130.5, 128.9, 125.2, 125.1, 125.0, 120.4, 120.0, 70.4, 42.7, 30.2, 20.0, 13.7. Anal. Calcd. for  $\text{C}_{19}\text{H}_{18}\text{N}_2\text{O}_2$ : C, 74.49; H, 5.92; N, 9.14%;. Found: C, 74.41; H, 5.84; N, 9.08%.

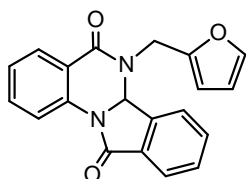

**6-Furan-2-ylmethyl-6,6a-dihydro-isoindolo[2,1-a]quinazoline-5,11-dione (4k)**

Yield: 250 mg, 76%; Gummy mass; IR (KBr): 3023, 1718, 1657, 1474  $\text{cm}^{-1}$ ;  $^1\text{H}$  NMR (400 MHz,  $\text{CDCl}_3$ ):  $\delta$  8.02-7.90 (m, 4H), 7.65-7.53 (m, 3H), 7.34 (d,  $J = 1.2$  Hz, 1H), 7.24 (t,  $J = 7.2$  Hz, 1H), 6.32-6.30 (m, 2H), 6.28 (s, 1H), 5.35 (d,  $J = 16.4$  Hz, 1H), 4.37 (d,  $J = 16.4$  Hz, 1H);  $^{13}\text{C}$  NMR (100 MHz,  $\text{CDCl}_3$ ):  $\delta$  165.0, 163.8, 150.4, 142.1, 138.1, 136.8, 133.6, 132.8, 132.6, 130.6, 129.2, 126.0, 125.2, 125.0, 120.3, 120.1, 110.8, 108.6, 70.9, 39.6. Anal. Calcd. for  $\text{C}_{20}\text{H}_{14}\text{N}_2\text{O}_3$ : C, 72.72; H, 4.27; N, 8.48%;. Found: C, 72.64; H, 4.21; N, 8.43%.

### E-factor Calculations:<sup>3</sup>

**Table 1** Three-component coupling of 2-carboxybenzaldehyde, isatoic anhydride and various amines: E-factor value for this protocol.<sup>a</sup>

| Entry | Isatoic anhydride (mmol) | 2-Carboxy benzaldehyde (mmol) | Amines (mmol)           | Product   | Isolated yield (%) <sup>b</sup> | Time (h) | E factor (kg waste/kg product) <sup>c</sup> |
|-------|--------------------------|-------------------------------|-------------------------|-----------|---------------------------------|----------|---------------------------------------------|
| 1     | 1                        | 1                             | Aniline (1)             | <b>4a</b> | 86                              | 10       | 0.45                                        |
| 2     | 1                        | 1                             | <i>p</i> -Toluidine (1) | <b>4b</b> | 84                              | 10       | 0.47                                        |

<sup>a</sup> All reactions are performed with CuO nano (5 mol%) in 3 mL of water under reflux.

<sup>b</sup> Isolated yields.

<sup>c</sup> Exclusion of ethyl acetate used for work up procedure, exclusion of the amount of the CuO nano used, and exclusion of ingredients used for chromatography.

**Note (Regarding Table 1, SI):** When the Authors have not reported the amount of solvent used in the work-up procedure, we have not accounted for solvent and considered that solvent can be recovered. By considering the CuO nano catalyst is recyclable and hence, waste is essentially eliminated.

#### For Entry 1, Table1 (SI)

$$\begin{aligned} E &= [0.163 \text{ g (isatoic anhydride)} + 0.150 \text{ g (2-carboxybenzaldehyde)} + 0.093 \text{ g (aniline)} - 0.280 \text{ g (product} \times \text{yield)}] / 0.280 \text{ g} \\ &= 0.45 \end{aligned}$$

#### For Entry 1, Table1 (SI)

$$\begin{aligned} E &= [0.163 \text{ g (isatoic anhydride)} + 0.150 \text{ g (2-carboxybenzaldehyde)} + 0.107 \text{ g (p-toluidine)} - 0.285 \text{ g (product} \times \text{yield)}] / 0.285 \text{ g} \\ &= 0.47 \end{aligned}$$



**Table 2** Effect of solvents on the synthesis of **4a** from compound **A** (Scheme 2 in Manuscript)<sup>a</sup>

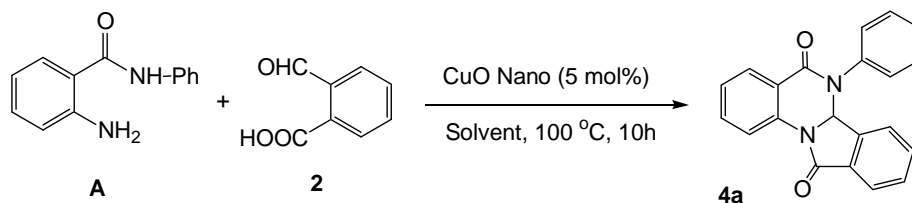

| Entry | Solvent | Yield (%) <sup>b</sup> |
|-------|---------|------------------------|
| 1     | EtOH    | 75                     |
| 2     | MeOH    | 70                     |
| 3     | MeCN    | 52                     |
| 4     | THF     | 50                     |
| 5     | Toluene | 57                     |
| 6     | Dioxane | 54                     |

<sup>a</sup> Reaction conditions: 1 mmol of **A** and 1 mmol of **2** in the presence of CuO nano (5 mol%) in 3 mL of solvents at 100 °C for 10 h. <sup>b</sup> Isolated yields.

#### Reusability of the catalyst:

After completion of the reaction, ethylacetate (10 mL) was added to the reaction mixture. Then the insoluble CuO nanoparticles were filtered by Teflon membrane (PTFE, 0.2 μm pore size). The CuO nanoparticles were thoroughly washed with ethanol, dried and reused for the next cycle. The catalyst was found to be effective up to sixth cycle giving a conversion of 78% in the case of **4a**.

#### References:

- 1 K. S. Kumar, P. M. Kumar, K. A. Kumar, M. Sreenivasulu, A. A. Jafar, D. Rambabu, G. R. Krishna, C. M. Reddy, R. Kapavarapu, K. Shivakumar, K. K. Priya, K. V. L. Parsa and M. Pal, *Chem. Commun.*, 2011, **47**, 5010.
- 2 K. V. Sashidhara, G. R. Palnati, R. P. Dodda, S. R. Avula, P. Swami, *Synlett*, 2013, **24**, 105.
- 3 (a) A. Kamal, V. Srinivasulu, B. N. Seshadri, N. Markandeya, A. Alarifi and N. Shankaraiah, *Green Chem.*, 2012, **14**, 2513; (b) R. A. Sheldon, *Chem. Commun.*, 2008, 3352.

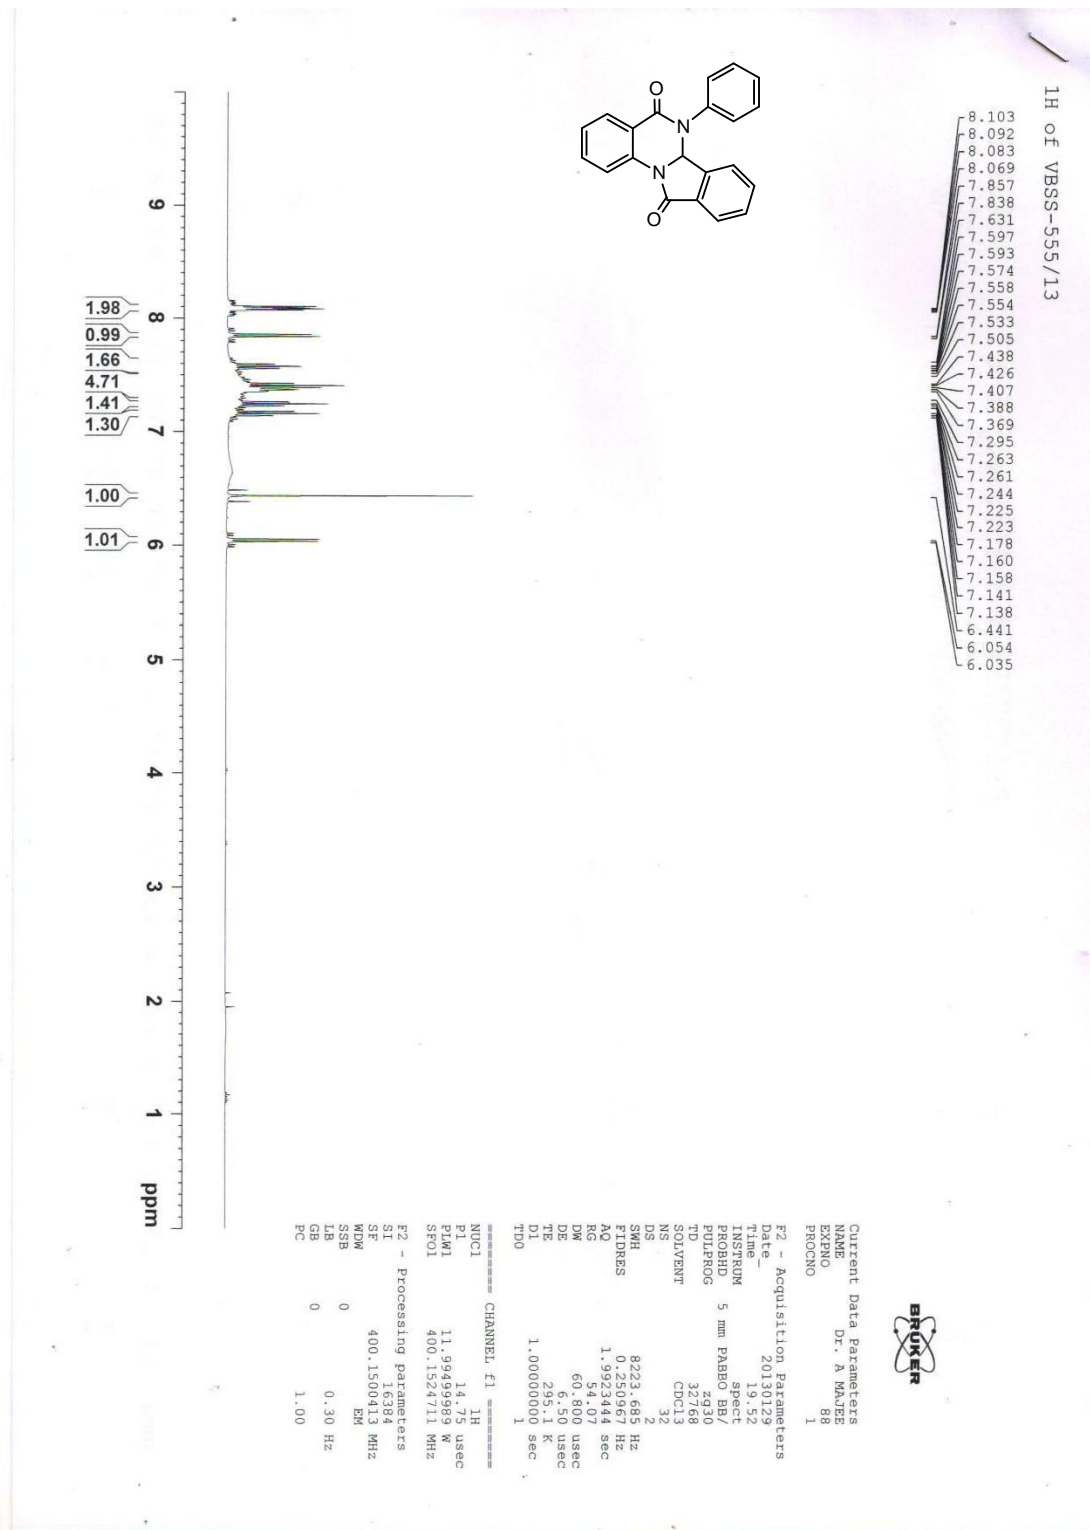

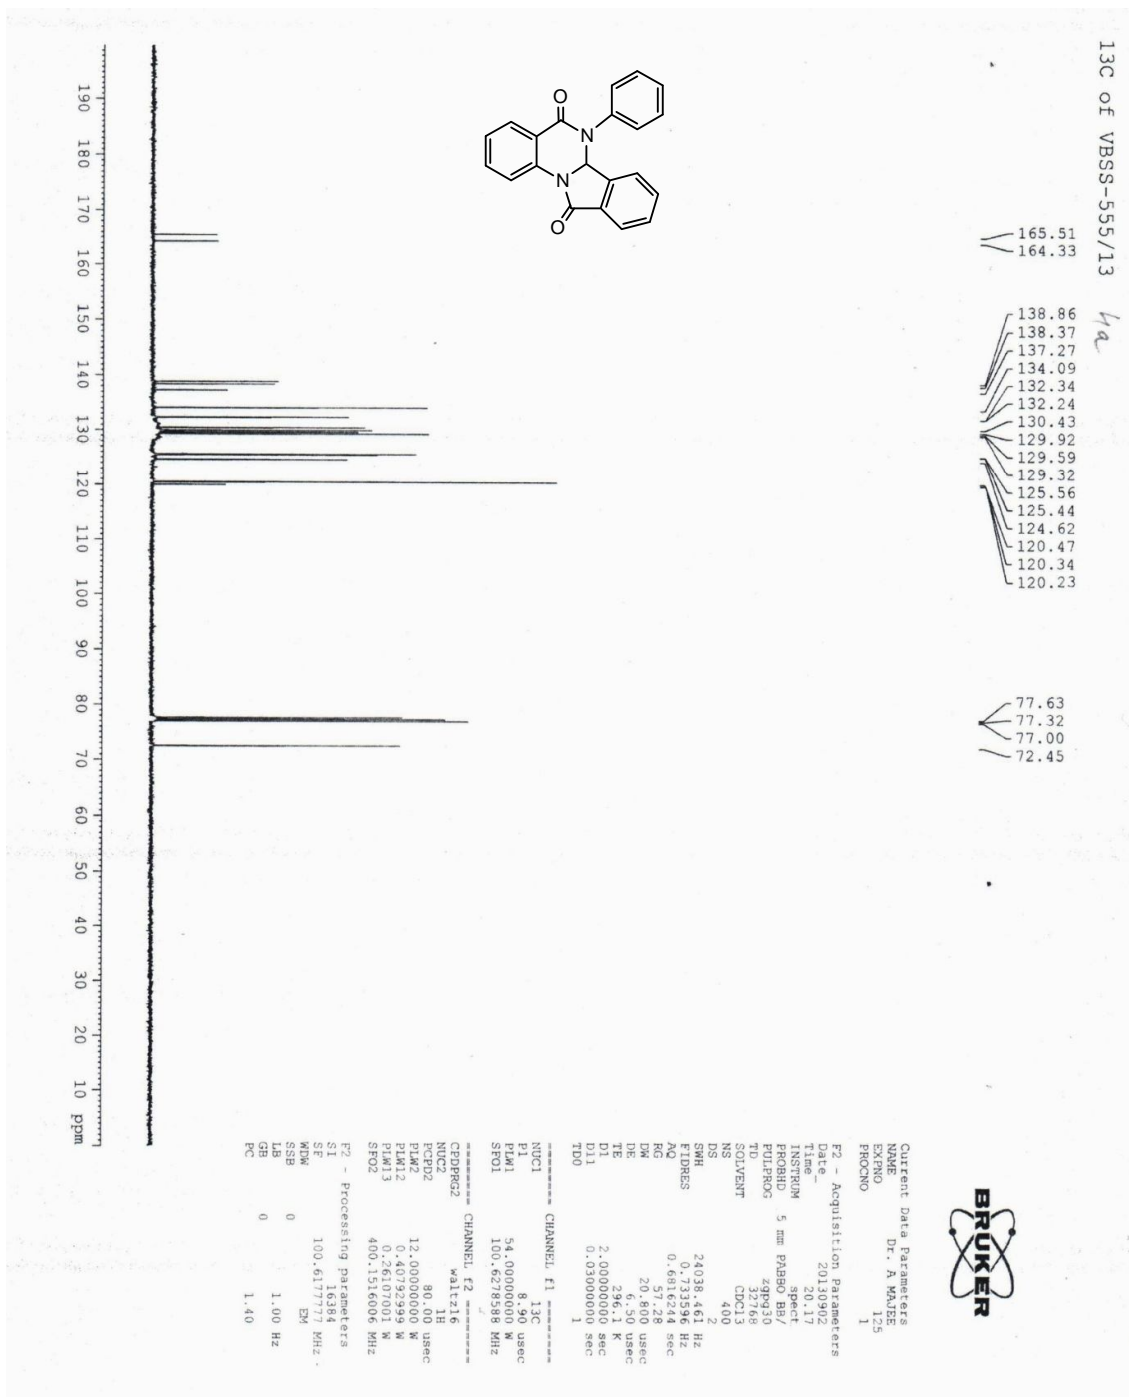

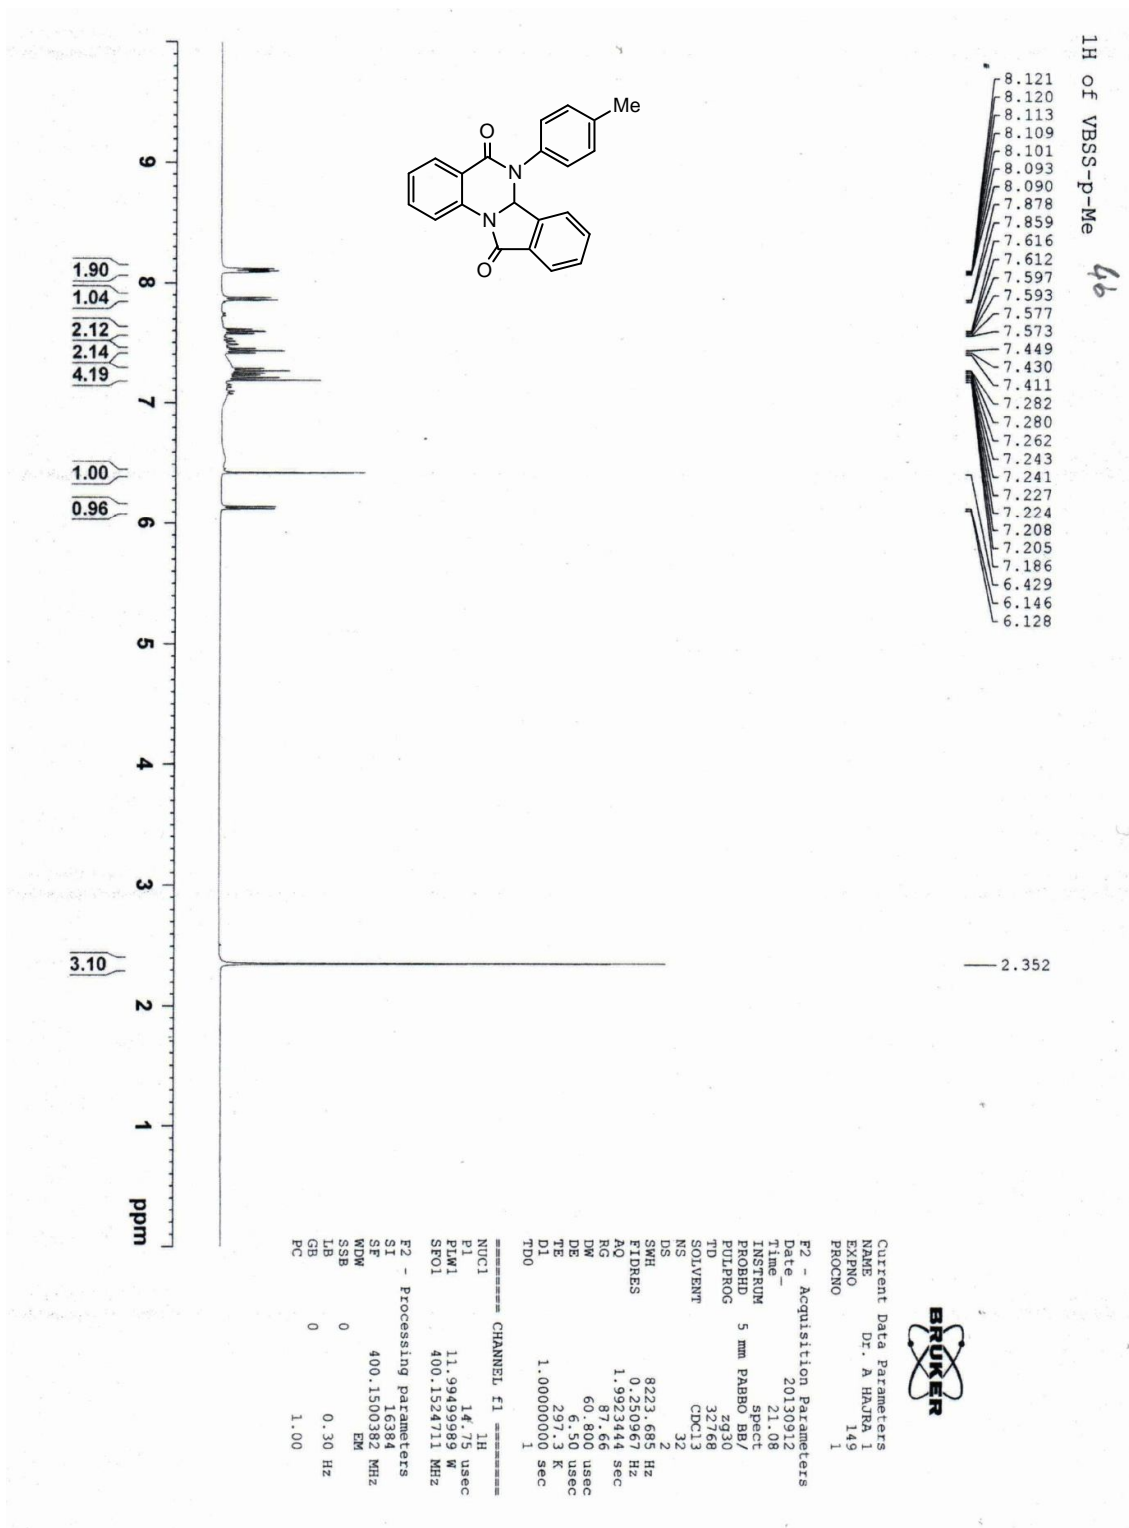

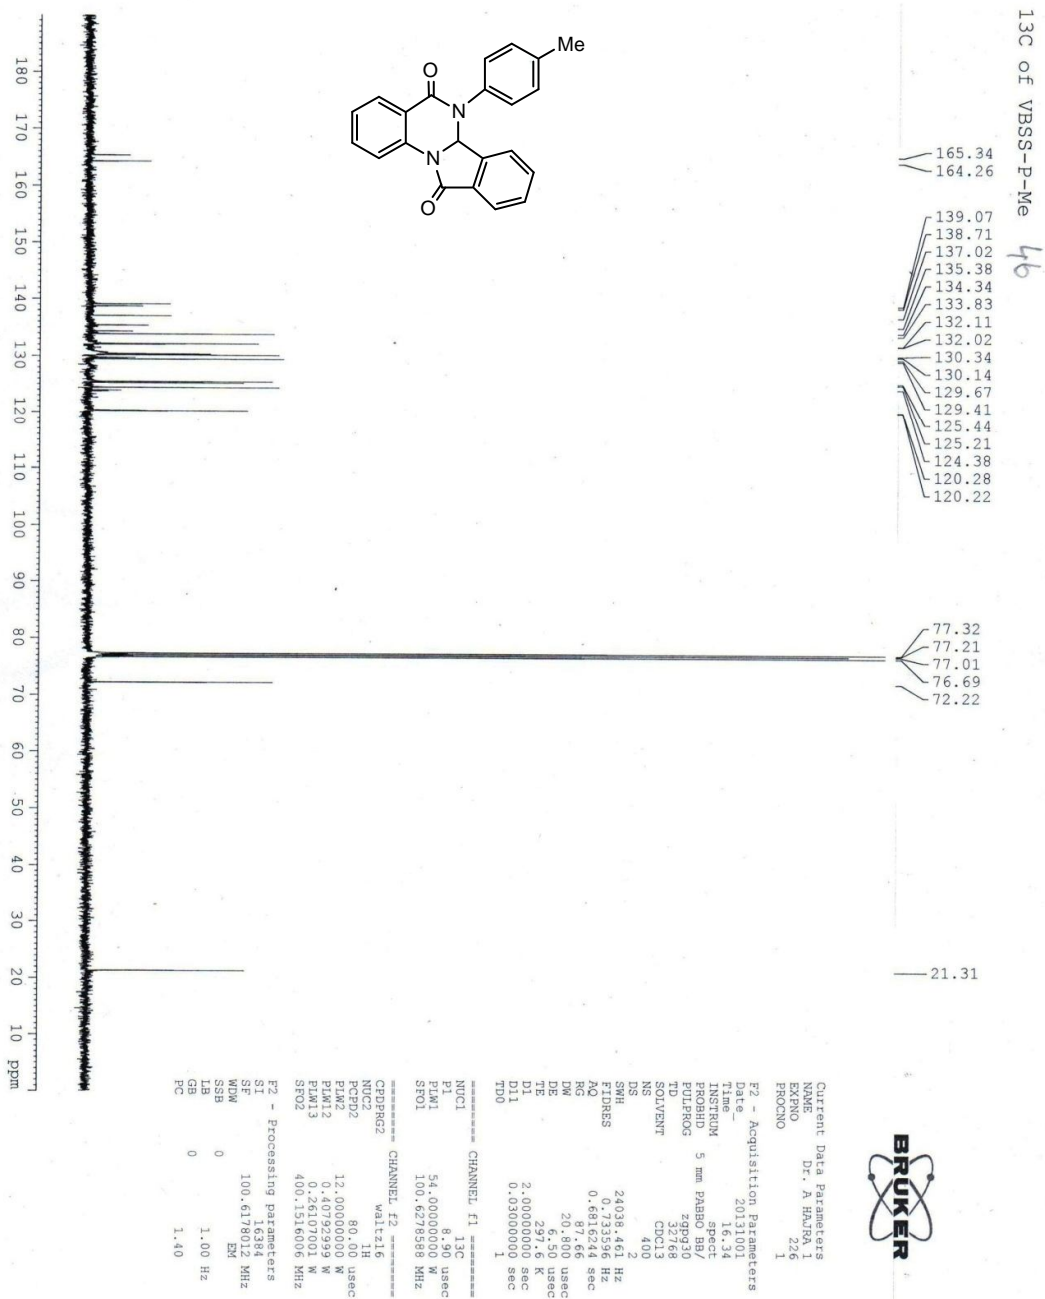

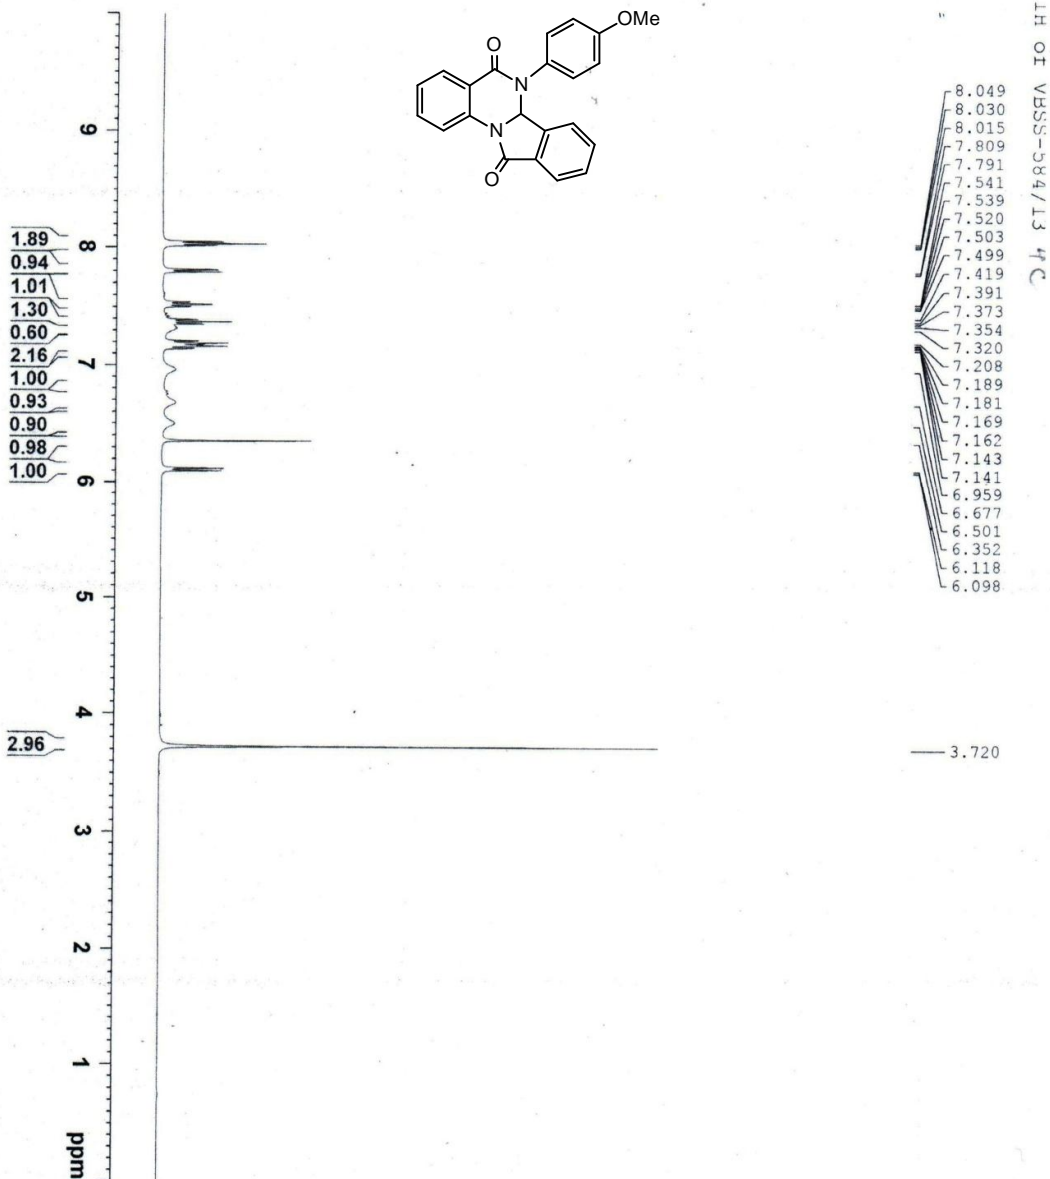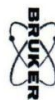

1H OF VBS5-384/L3 4°C

8.049  
8.030  
8.015  
7.809  
7.791  
7.541  
7.539  
7.520  
7.503  
7.499  
7.419  
7.391  
7.373  
7.354  
7.320  
7.208  
7.189  
7.181  
7.169  
7.162  
7.143  
7.141  
6.959  
6.677  
6.501  
6.352  
6.118  
6.098

3.720

Current Data Parameters  
 NAME Dr. A MAJEE  
 EXPNO 403  
 PROCNO 1

F2 - Acquisition Parameters  
 Date\_ 20130909  
 Time 19.35

INSTRUM spect  
 PROBHD 5 mm PABBO BB/  
 PULPROG zg30  
 TD 32768  
 SOLVENT CDCl3  
 NS 32  
 DS 2

SWH 8223.685 Hz  
 FIDRES 0.250967 Hz  
 AQ 1.9923444 sec  
 RG 54.07  
 DW 60.800 usec  
 DE 6.50 usec  
 TE 297.0 K  
 D1 1.00000000 sec  
 TDO 1

===== CHANNEL f1 =====  
 NUCL1 1H  
 P1 14.75 usec  
 PL1 11.99439869 W  
 FLM1 400.1524711 MHz  
 SFO1 400.1524711 MHz

F2 - Processing parameters  
 SF 400.1500572 MHz  
 WDM EM  
 SSB 0  
 LB 0.30 Hz  
 GB 0  
 PC 1.00

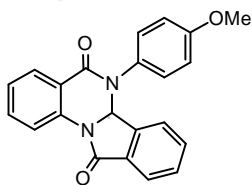

<sup>13</sup>C of VBSS\_584/13

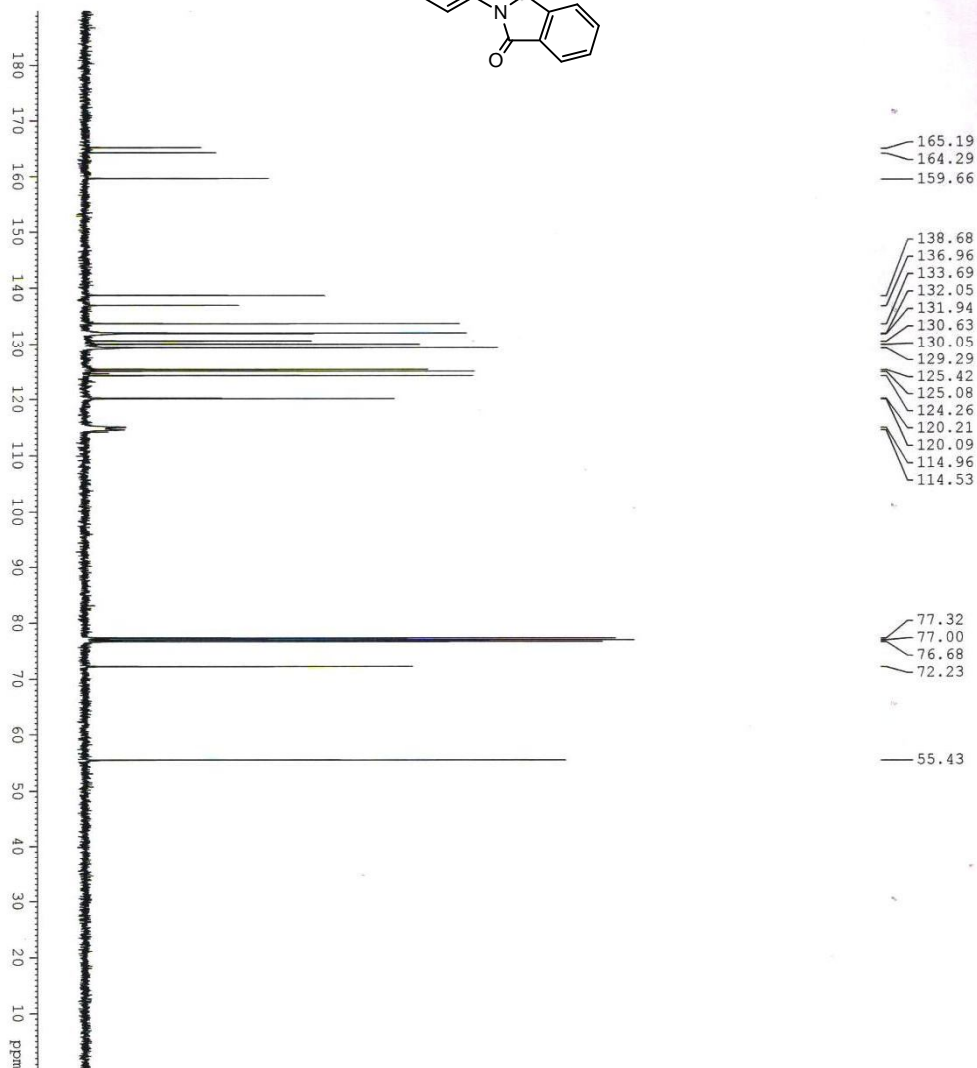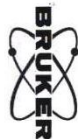

Current Data Parameters  
 NAME Dr. A MAJER  
 EXPNO 407  
 PROCNO 1

F2 - Acquisition Parameters

Date\_ 20130407  
 Time 20.36  
 INSTRUM spect  
 PROBRG 5 mm PABBO BH/   
 PULPROG zgpg30  
 TD 32768  
 SOLVENT CDCl3  
 NS 320  
 DS 2  
 SFO 24038.444 Hz  
 FIDRES 0.73356 Hz  
 AQ 0.616244 sec  
 RG 54.07  
 LW 20.800 usec  
 DE 6.50 usec  
 TE 300.2 K  
 D1 2.0000000 sec  
 D11 0.03000000 sec  
 TDO 1

CHANNEL F1 <sup>13</sup>C  
 NUCL1 13C  
 P1 8.90 usec  
 PL1 54.00000000 W  
 SFO1 100.6278588 MHz

CHANNEL F2 <sup>1</sup>H  
 CPDPRG2 waltz16  
 NUCC2 1H  
 PCPD2 80.00 usec  
 PLM2 12.00000000 W  
 PLM3 0.40100000 W  
 PLM4 0.40100000 W  
 SFO2 400.1516006 MHz

F2 - Processing parameters  
 SI 16384  
 SF 100.61898 MHz  
 WDW EM  
 SSB 0  
 LB 1.00 Hz  
 GB 0  
 PC 1.40



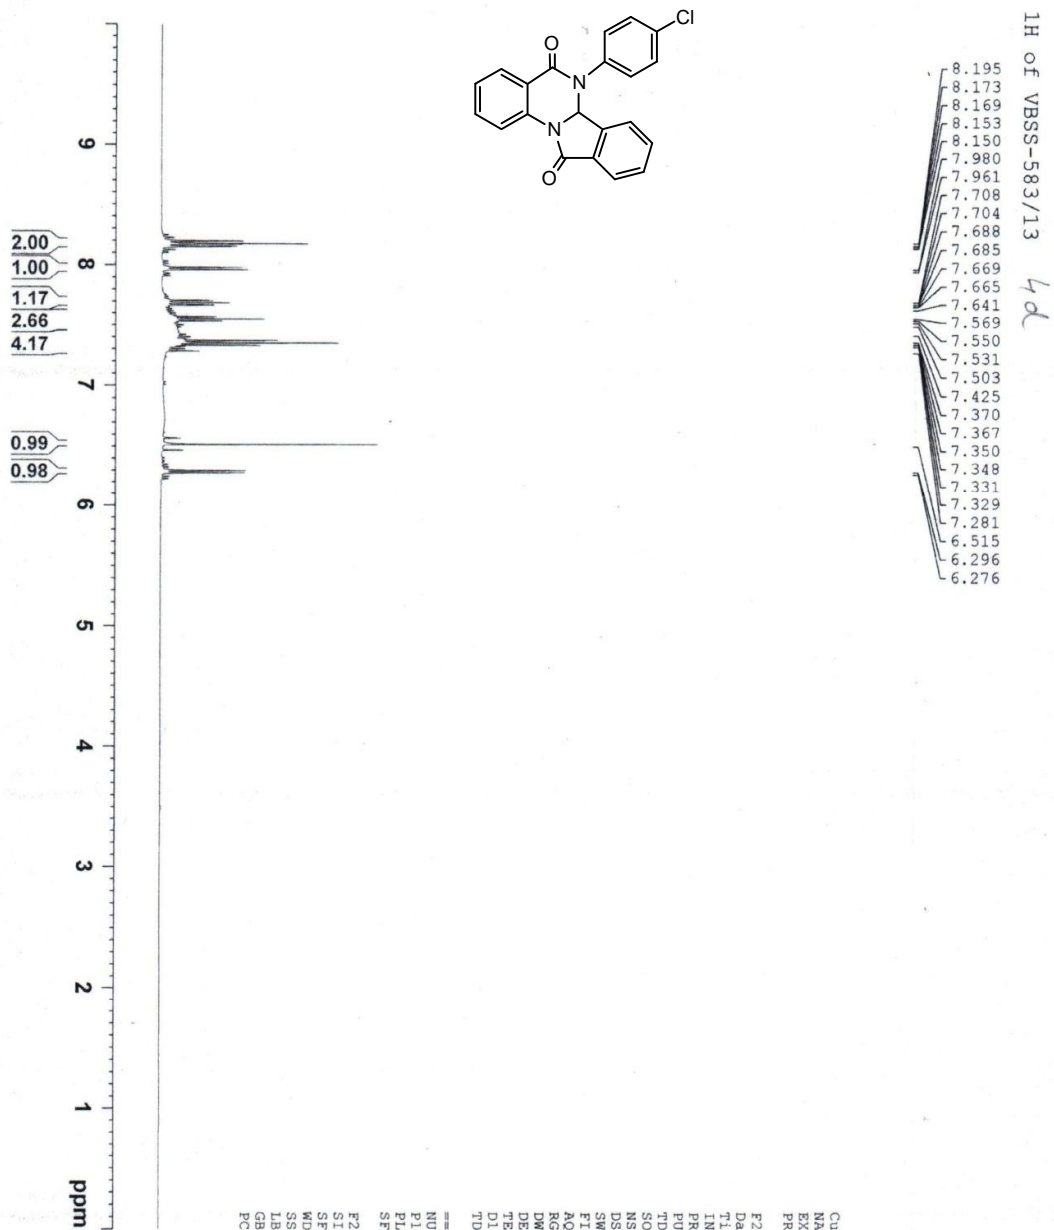

- 1H of VBSS-583/13 4d
- 8.195
  - 8.173
  - 8.169
  - 8.153
  - 8.150
  - 7.980
  - 7.961
  - 7.708
  - 7.704
  - 7.688
  - 7.685
  - 7.669
  - 7.665
  - 7.641
  - 7.569
  - 7.550
  - 7.531
  - 7.503
  - 7.425
  - 7.370
  - 7.367
  - 7.350
  - 7.348
  - 7.331
  - 7.329
  - 7.281
  - 6.515
  - 6.296
  - 6.276

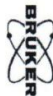

Current Data Parameters  
 NAME Dr. A MAJEE  
 EXPNO 135  
 PROCNO 1

F2 - Acquisition Parameters  
 Date\_ 20130905  
 Time 18.20

INSTRUM spect  
 PROBHD 5 mm PABBO BH/  
 PULPROG zg30  
 TD 32768  
 SOLVENT CDCl3

NS 32  
 SSB 0  
 SMH 8223.685 Hz  
 FIDRES 0.250967 Hz  
 AQ 1.992344 sec  
 RG 67.81  
 DW 60.800 usec  
 DE 6.50 usec  
 TE 296.5 K  
 DI 1.00000000 sec  
 TDO 1

===== CHANNEL f1 =====  
 NUCL 1H  
 P1 14.75 usec  
 PLW1 11.9949989 W  
 SFO1 400.1524711 MHz

F2 - Processing parameters  
 SI 16384  
 SF 400.1500000 MHz  
 WDW EM  
 SSB 0  
 LB 0.30 Hz  
 GB 0  
 PC 1.00



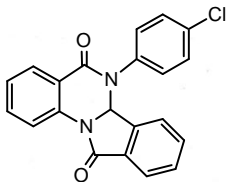

13C OF VBSS-583/13

- 165.40
- 164.40
- 138.59
- 137.31
- 136.86
- 135.23
- 134.32
- 132.57
- 132.34
- 130.66
- 130.18
- 129.64
- 129.54
- 125.56
- 124.89
- 120.57
- 120.23
- 120.18

- 77.64
- 77.32
- 77.00
- 72.37

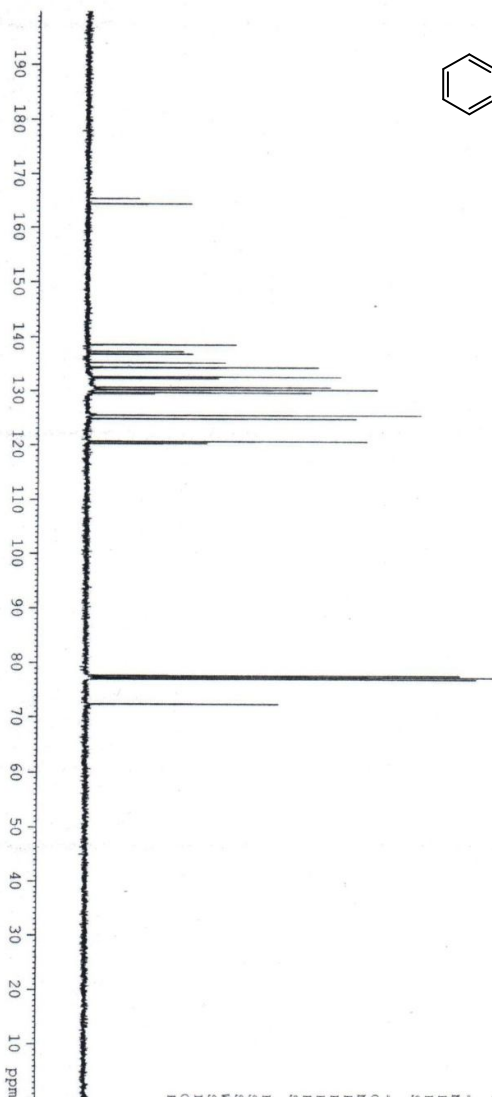

Current Data Parameters  
 NAME Dr. A. M. S. S.  
 EXPNO 304  
 PROCNO 1

F2 - Acquisition Parameters  
 Date\_ 20130905  
 Time 21:40  
 INSTRUM spect  
 PROBRID 5 mm PABBO BB/  
 FIDPROC zgpg30  
 TD 32768  
 SOLVENT CClCl3  
 NS 400  
 DS 2  
 SFO1 24038.441 Hz  
 FIDRES 0.733596 Hz  
 AQ 0.6816244 sec  
 RG 62.69  
 DW 20.800 usec  
 DE 2.000 usec  
 TE 300.2 K  
 D1 2.00000000 sec  
 D11 0.03000000 sec  
 TD0 1

===== CHANNEL f1 =====  
 NUC1 13C  
 P1 8.90 usec  
 PLW1 54.00000000 W  
 SFO1 100.6278588 MHz

===== CHANNEL f2 =====  
 CPDPRG2 waltz16  
 NUC2 1H  
 PCPDZ 80.00 usec  
 PLW2 12.00000000 W  
 PLW12 0.40792999 W  
 PLW13 0.26107001 W  
 SFO2 400.1516906 MHz

F2 - Processing parameters  
 SI 16384  
 SF 100.6177733 MHz  
 WTM 0  
 SSB 0  
 GB 0  
 PC 1.40

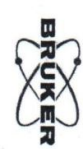

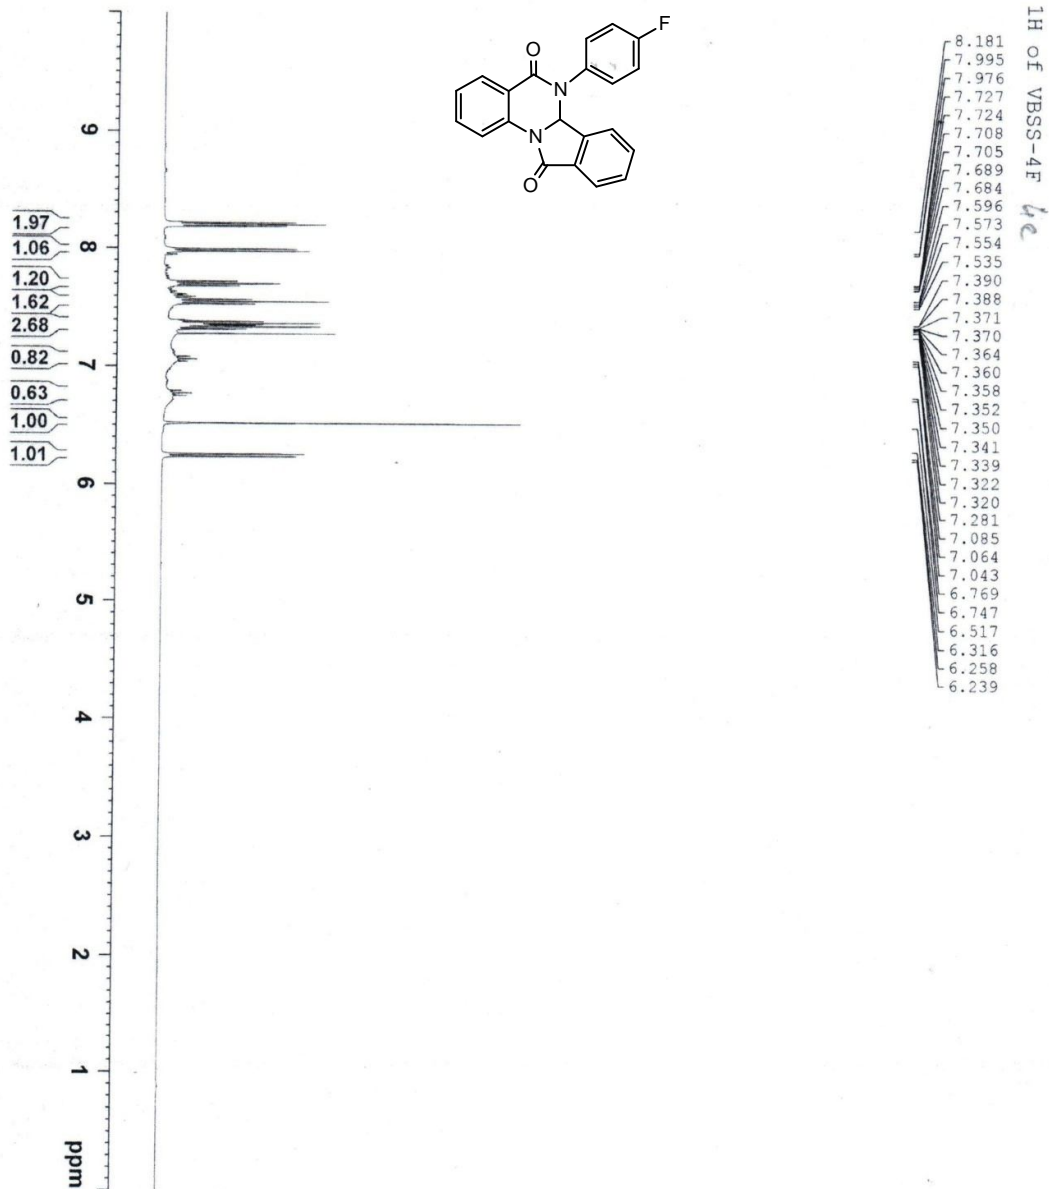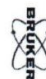

Current Data Parameters  
 NAME Dr. A. HAUPT  
 EXPNO 167  
 PROCNO 1

F2 - Acquisition Parameters

Date\_ 20130915  
 Time 18:48  
 INSTRUM spect  
 PROBHD 5 mm PABBO BB/  
 PULPROG zg30  
 TD 32768  
 SOLVENT CDCl3  
 NS 32  
 DS 2  
 SWH 8223.685 Hz  
 FIDRES 0.250967 Hz  
 AQ 1.9923444 sec  
 RG 93.46  
 DW 60.800 usec  
 DE 6.50 usec  
 TE 297.0 K  
 D1 1.00000000 sec  
 TDO 1

CHANNEL F1

NUC1 1H  
 P1 14.75 usec  
 PL1 11.99499989 W  
 SFO1 400.1524711 MHz

F2 - Processing parameters

SF 16384  
 WF 400.1500000 MHz  
 EM  
 SSB 0  
 LB 0.30 Hz  
 GB 0  
 PC 1.00

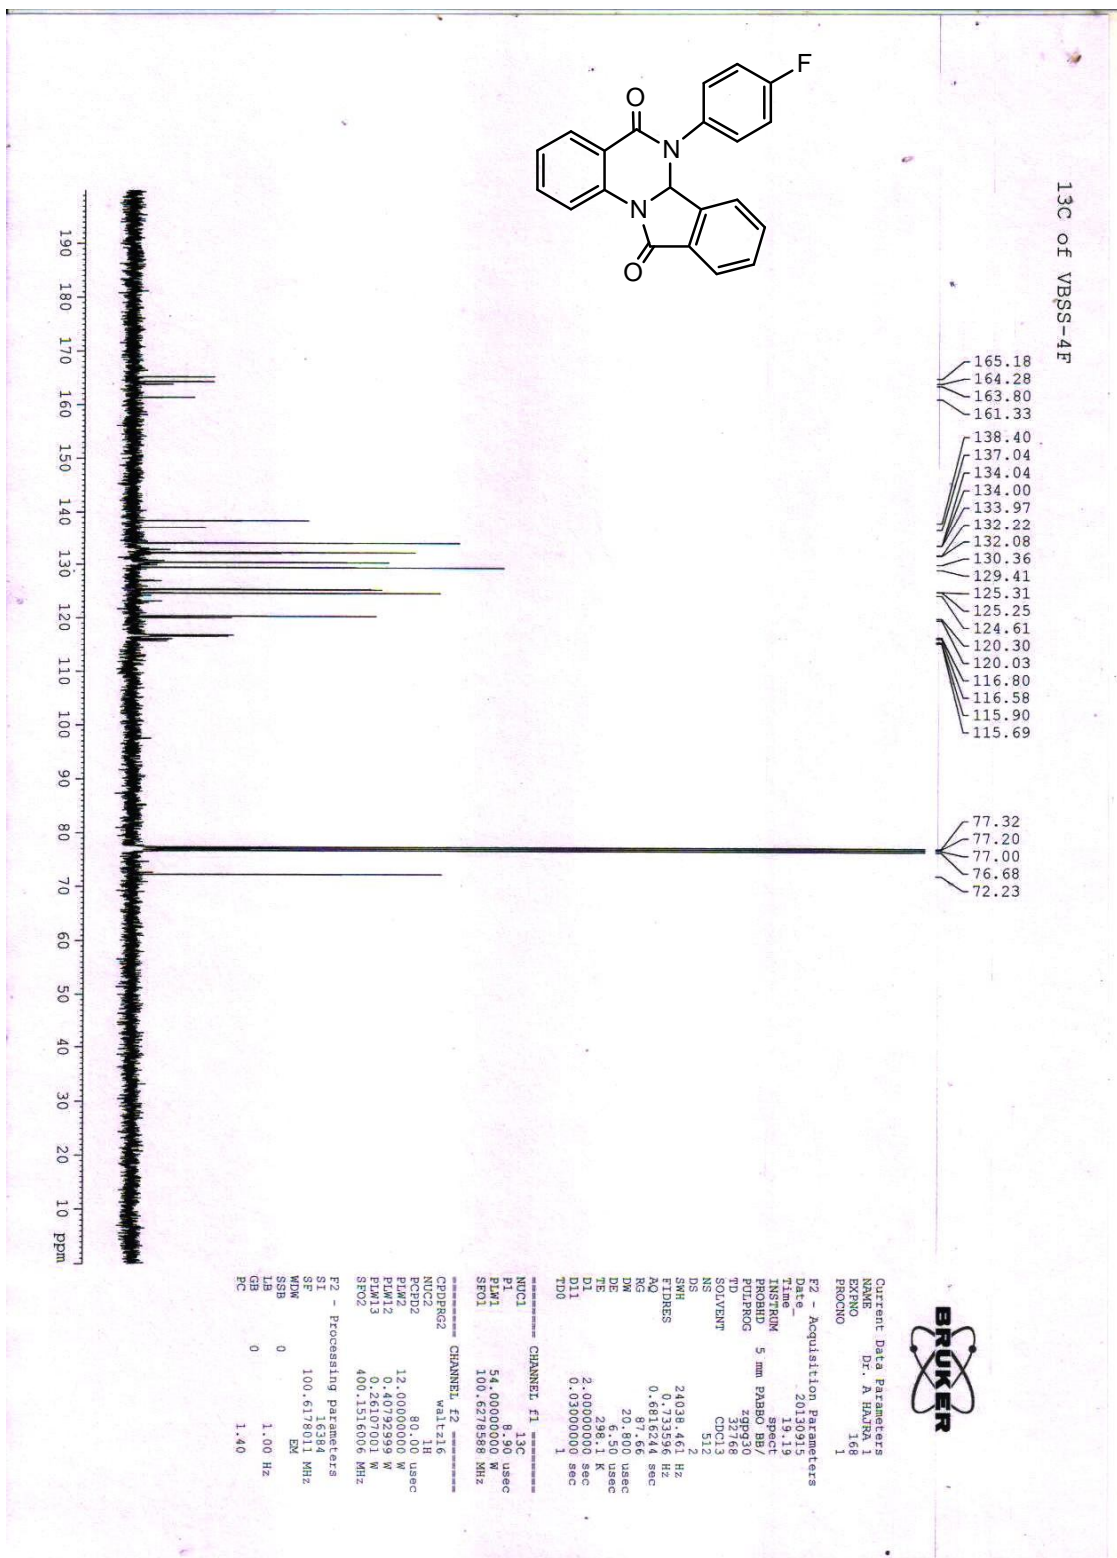

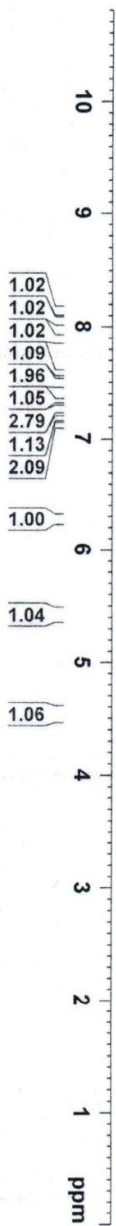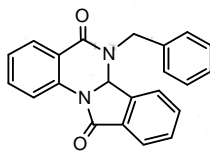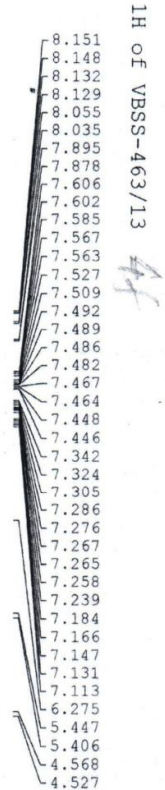

Current Data Parameters  
 NAME Dr. A HAJRA 1  
 EXPNO 132  
 PROCNO 1

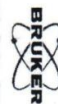

F2 - Acquisition Parameters  
 Date\_ 20130909  
 Time 12.52

INSTRUM spect  
 PROBHD 5 mm PABBO BB/  
 PULPROG zg30  
 TD 32768  
 SOLVENT CDCl3  
 NS 32

DSH 8223.685 Hz  
 FIDRES 0.620961 Hz  
 AQC 1.992444 sec  
 RG 7749  
 DM 60.800 usec  
 DE 6.50 usec  
 TE 297.2 K  
 DI 1.00000000 sec  
 TDO 1

===== CHANNEL f1 =====

NUC1 1H  
 PI 14.75 usec  
 PLW1 11.99499893 W  
 SFO1 400.1524711 MHz  
 F2 - Processing parameters  
 SI 16384  
 SF 400.1500391 MHz  
 WDW EM  
 SSB 0  
 LB 0.30 Hz  
 GB 0  
 PC 1.00

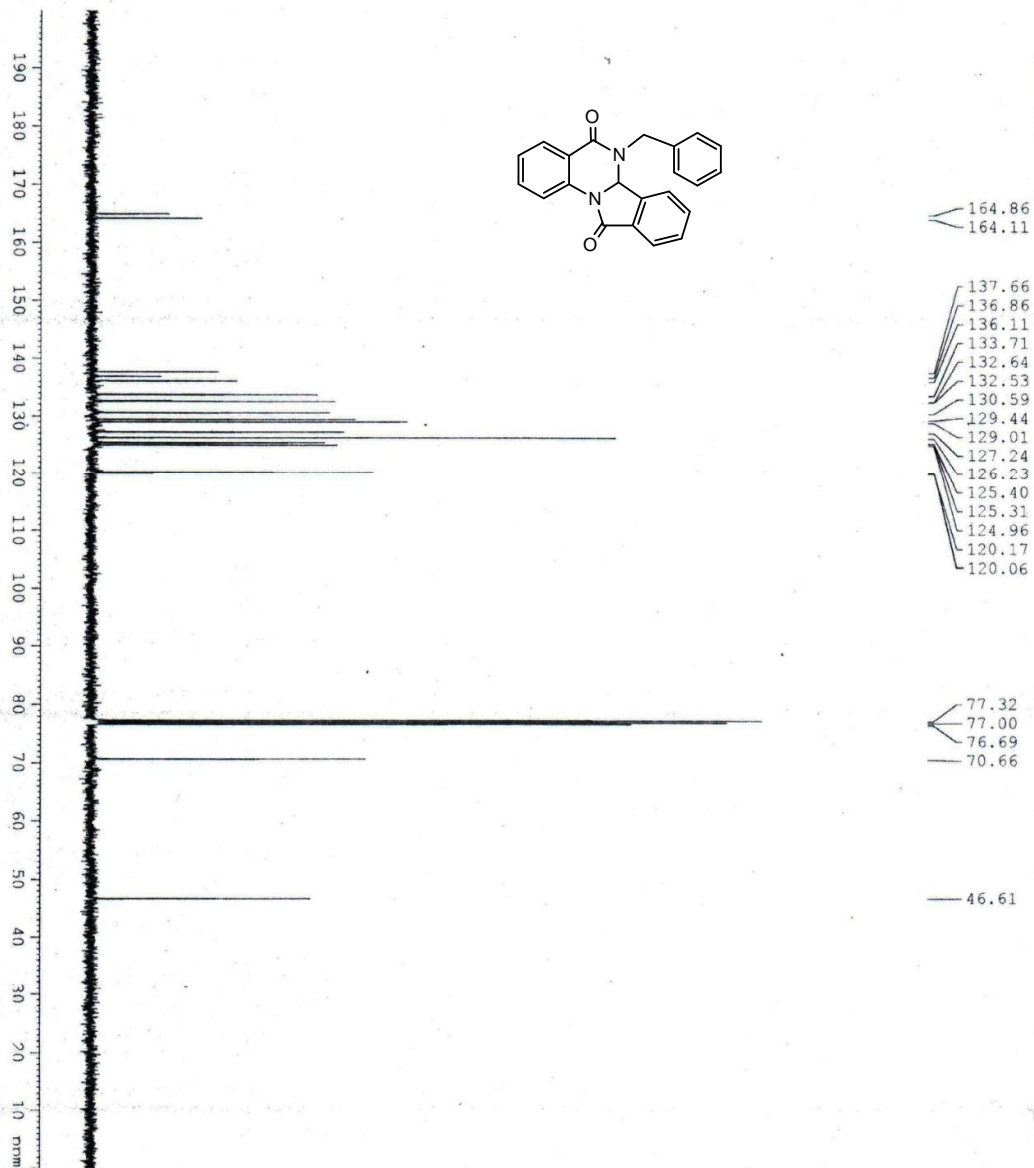

SC-463 4f

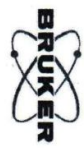

Current Data Parameters  
 NAME Dr. A. HAFRA 1  
 EXPERNO 133  
 PROCNO 1

F2 - Acquisition Parameters  
 Date\_ 20130905  
 Time\_ 13.10  
 INSTRUM spect  
 PROBRD 5 mm F400 BB/  
 PULPROG zgpg30  
 TD 32768  
 SOLVENT CDCl3  
 NS 320  
 DS 2  
 SFO 24038.442 Hz  
 SWH 47215.66 Hz  
 FIDRES 0.6816244 sec  
 AQ 77.59  
 RG 20.800 usec  
 DE 6.50 usec  
 TE 298.3 K  
 D1 2.00000000 sec  
 D11 0.03000000 sec  
 TDO 1

CHANNEL F1  
 NUCL1 13C  
 P1 8.90 usec  
 PLM1 54.00000000 W  
 SFO1 100.6278588 MHz

CHANNEL F2  
 NUC2 1H  
 P2 12.00 usec  
 PLM2 12.00000000 W  
 PLM12 0.40792999 W  
 PLM13 0.28107001 W  
 SFO2 400.1516006 MHz

F2 - Processing parameters  
 SI 16384  
 SF 100.6178026 MHz  
 NS 655  
 SSB 0 EM  
 LB 1.00 Hz  
 GB 0  
 PC 1.40

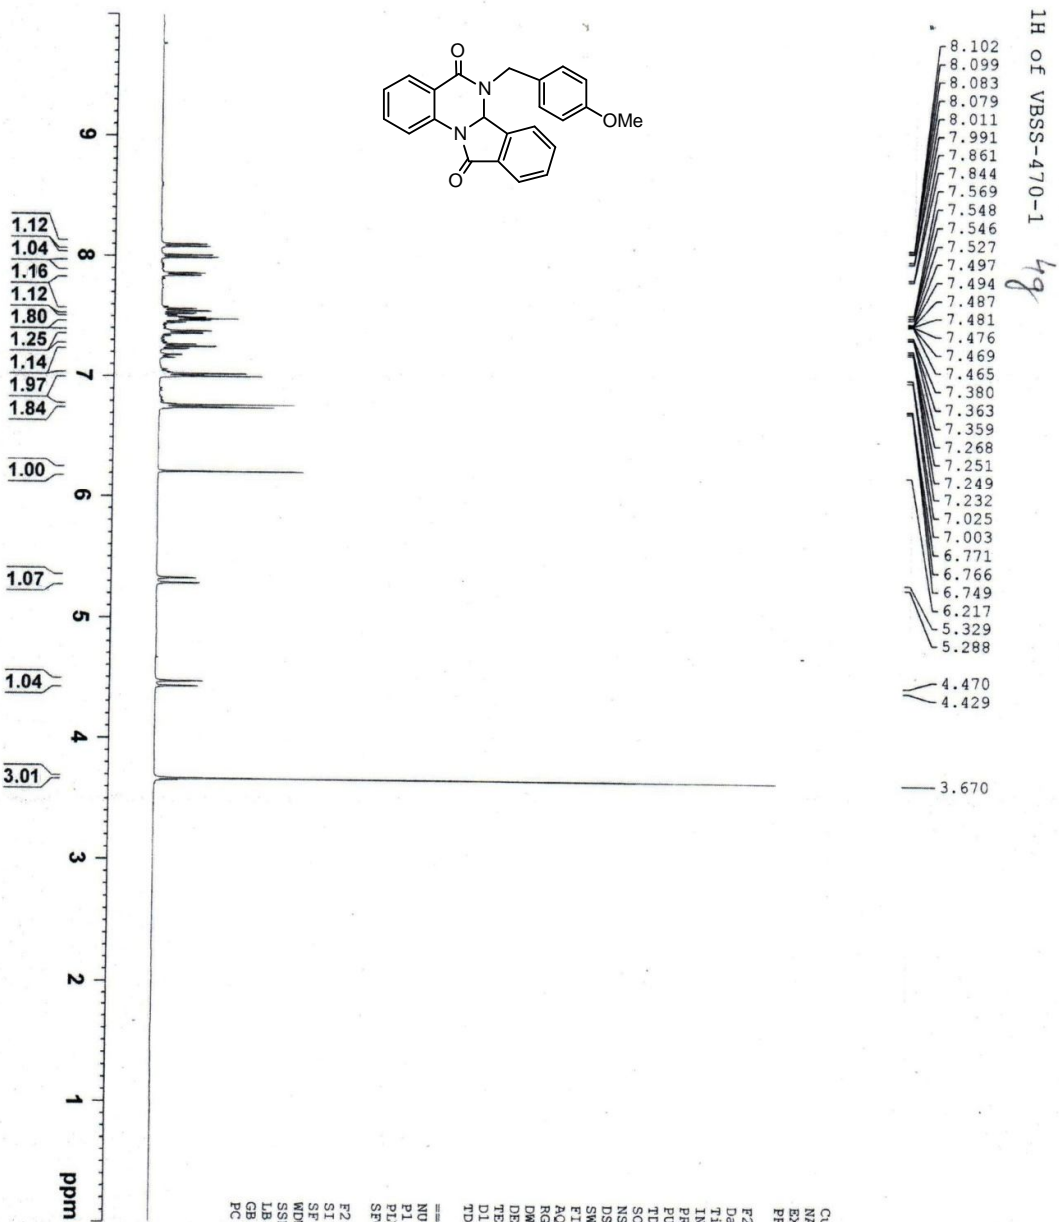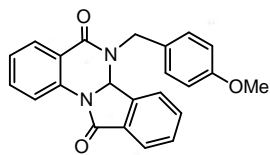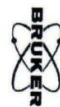

Current Data Parameters  
 NAME Dr. A HAJRA  
 EXPNO 255  
 PROCNO 1

F2 - Acquisition Parameters  
 Date\_ 20130917  
 Time 21.18

INSTRUM spect  
 PROBHD 5 mm PABBO BB/  
 PULPROG zg30  
 TD 32768  
 SOLVENT CDCl3  
 NS 16  
 DS 2

SWH 8223.685 Hz  
 FIDRES 0.250967 Hz  
 RG 1.9923444 sec  
 RQ 37.83  
 DM 60.800 usec  
 DE 297.0 K  
 TE 297.2 K  
 D1 1.00000000 sec  
 TDO 1

CHANNEL F1

NUC1 1H  
 P1 14.75 usec  
 PLMT 11.99499989 W  
 SFO1 400.1524711 MHz

F2 - Processing parameters  
 SI 16384  
 SF 400.1500396 MHz  
 MDW EM  
 SSB 0  
 LB 0.30 Hz  
 GB 0  
 PC 1.00



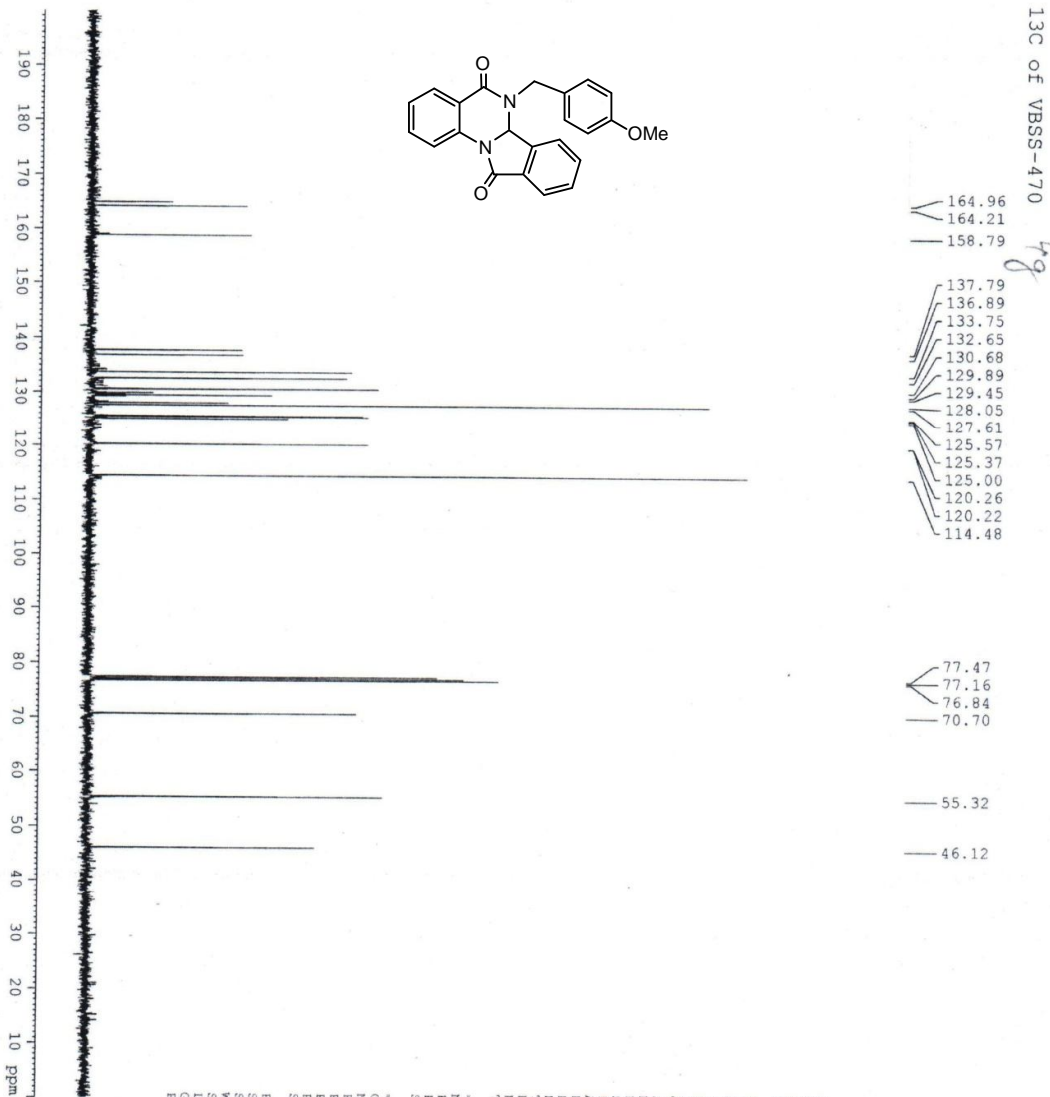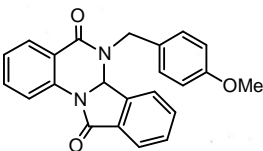

Current Data Parameters  
 NAME Dr. A HAJRA  
 EXPNO 260  
 PROCNO 1

F2 - Acquisition Parameters  
 Date\_ 20130918  
 Time 21.29  
 INSTRUM spect  
 PROBHD 5 mm PABBO BH/  
 PULPROG zgpg30  
 TD 32768  
 FIDRES 0.340000  
 TD 32768  
 SOLVENT CDCl3  
 NS 128  
 DS 2  
 SWH 24038.461 Hz  
 FIDRES 0.3413294 Hz  
 AQ 0.691783 sec  
 RG 657.83  
 LW 20.800 usec  
 DE 6.50 usec  
 FE 298.1 K  
 FI 1  
 D11 0.3000000 sec  
 TDO 1

CHANNEL f1  
 NUC1 13C  
 P1 8.50 usec  
 PL1 54.000000 MHz  
 SFO1 100.6278988 MHz

CHANNEL f2  
 NUC2 1H  
 P2 8.00 usec  
 PL2 12.0000000 MHz  
 SFO2 400.1516006 MHz

F2 - Processing parameters  
 SI 32768  
 SF 100.6177938 MHz  
 WDW EM  
 SSB 0  
 LB 1.00 Hz  
 GB 0  
 PC 1.40

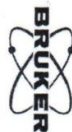

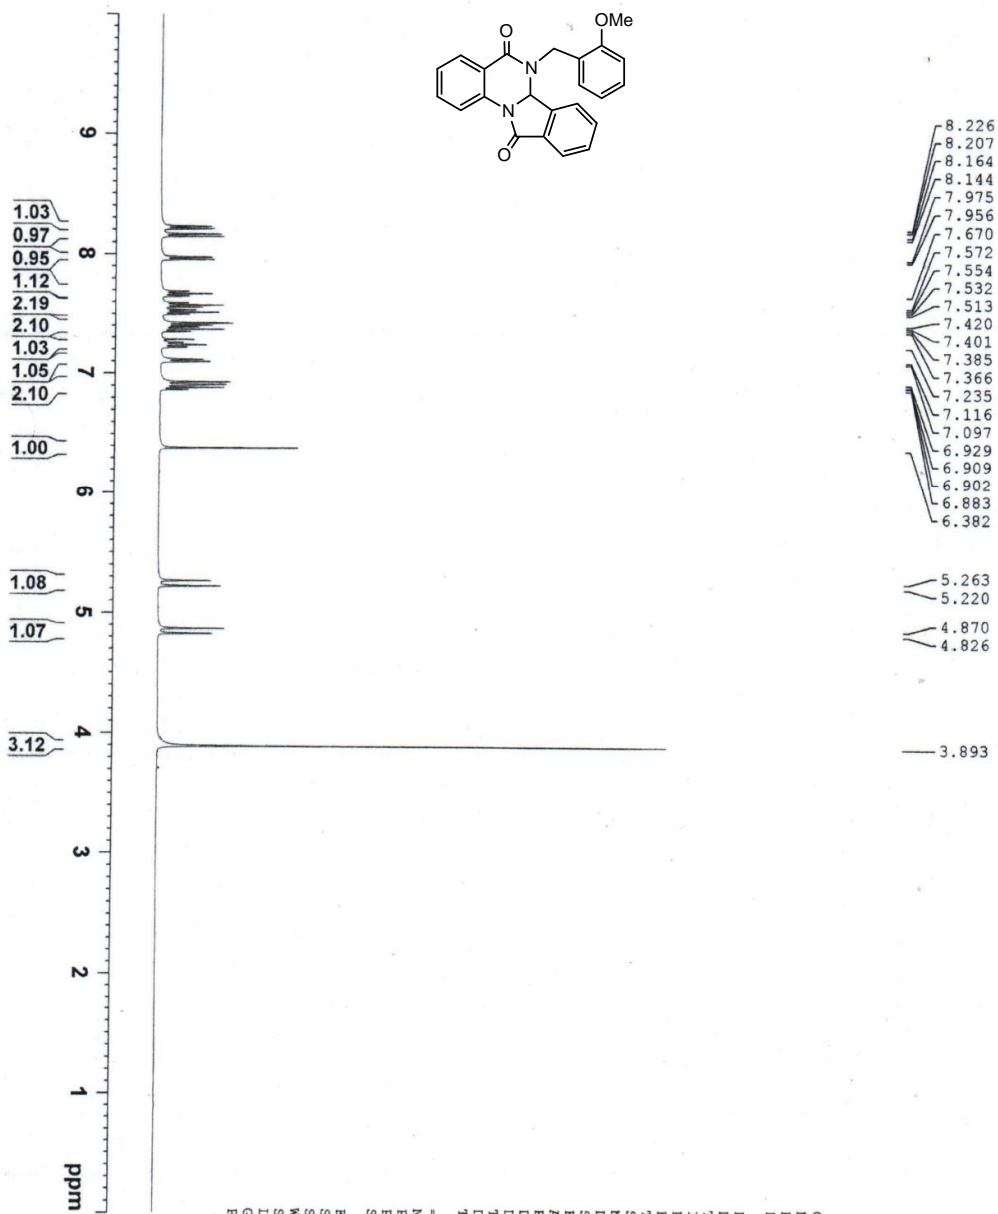

1H of VBSS-480/12 4h

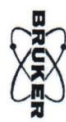

Current Data Parameters  
 NAME Dr. A HAJRA 1  
 EXPNO 148  
 PROCNO 1

F2 - Acquisition Parameters  
 Date\_ 20130912  
 Time 21.01  
 INSTRUM spect  
 PROBHD 5 mm PABBO BBI  
 PULPROG zg30  
 TD 32768  
 SOLVENT CDCl3  
 NS 32  
 DS 2  
 SWH 8223.682 Hz  
 FIDRES 0.250967 Hz  
 AQ 1.9923444 sec  
 RG 67.81  
 DW 60.800 usec  
 DE 6.50 usec  
 TE 297.4 K  
 D1 1.00000000 sec  
 TDO 1

CHANNEL F1  
 NUC1 1H  
 P1 14.75 usec  
 PL1 11.99499989 W  
 SF01 400.1524711 MHz

F2 - Processing parameters  
 SI 16384  
 SF 400.1500000 MHz  
 NDW EM  
 SSB 0  
 LB 0.30 Hz  
 GB 0  
 PC 1.00



13C of VBSS-480/13

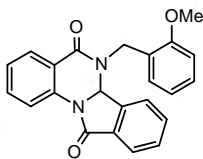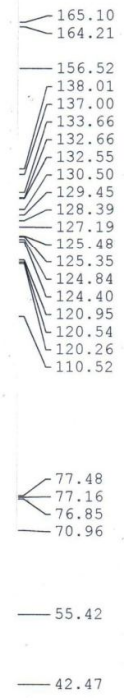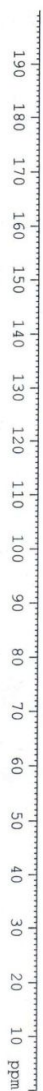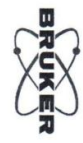

Current Data Parameters  
 Name: Dr. A. HADJINIKOLAOU  
 EXPNO: 1  
 PROCNO: 1

F2 - Acquisition Parameters  
 Date\_: 20130917  
 Time: 8:00  
 INSTRUM: spect  
 PROBHD: 5 mm EBBBO BB/  
 PULPROG: zgpg30  
 TD: 32768  
 SOLVENT: CDCl3  
 NS: 400  
 DS: 4  
 SWH: 24038.461 Hz  
 FIDRES: 0.733596 Hz  
 AQ: 0.6816244 sec  
 RG: 67.81  
 DW: 20.800 usec  
 DE: 19.000 usec  
 TE: 298.1 K  
 D1: 2.00000000 sec  
 D11: 0.03000000 sec  
 TDO: 1

CHANNEL F1 13C  
 NUQ1 13C  
 P1 8.90 usec  
 PLW1 54.00000000 W  
 SF01 100.6278588 MHz

CHANNEL F2 1H  
 CPDPRG2 waltz16  
 NUQ2 1H  
 PCPD2 80.00 usec  
 PLW2 12.00000000 W  
 SF02 400.1516006 MHz

F2 - Processing parameters  
 SI 16384  
 SF 100.6177881 MHz  
 GB 0  
 EN 8  
 LB 0  
 GB 0  
 PC 1.40

1H of VBSS-637/13

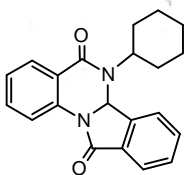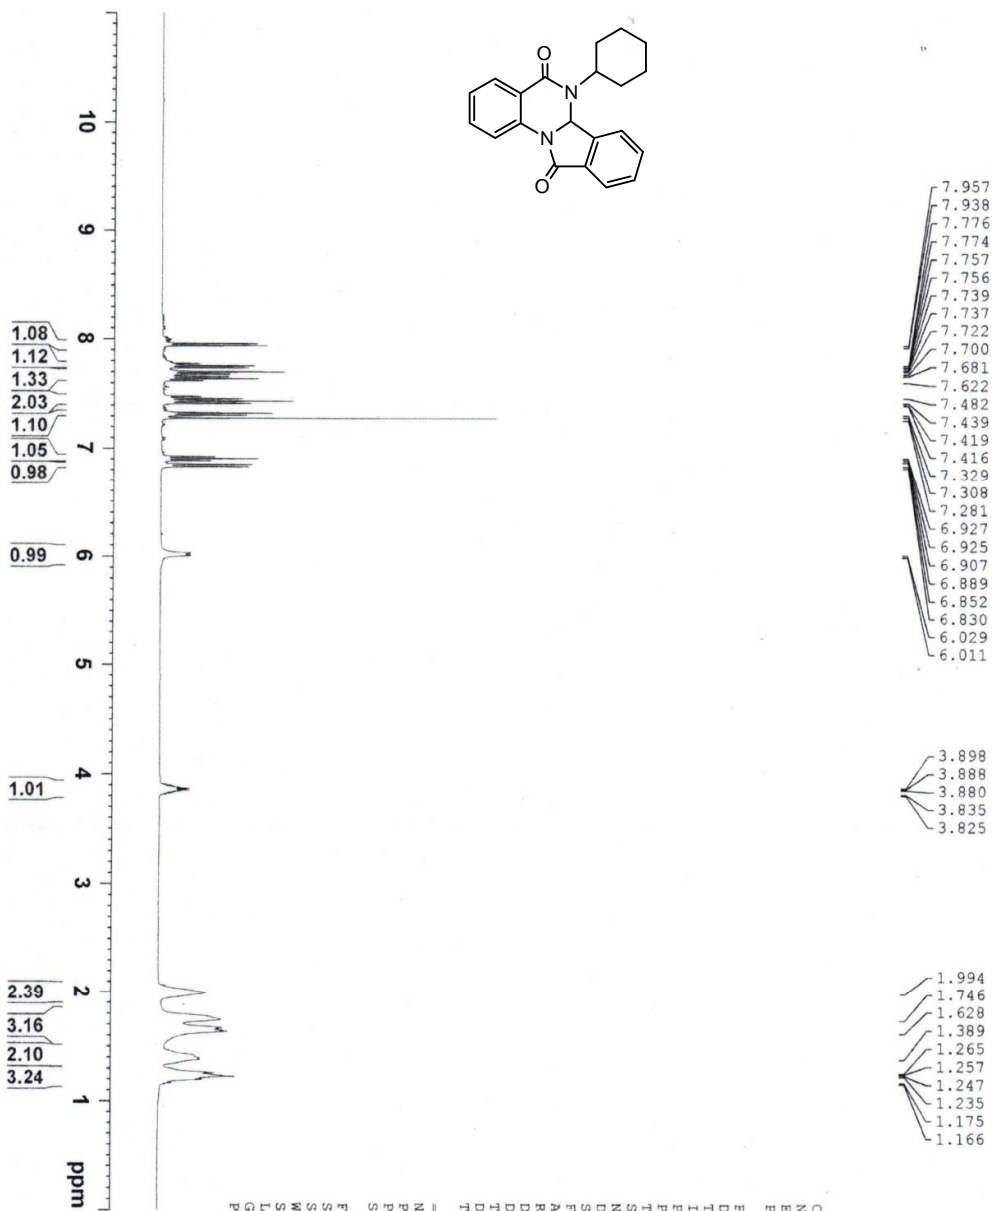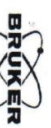

Current Data Parameters  
 NAME Dr. A HAJRA.1  
 EXPNO 147  
 PROCNO 1

F2 - Acquisition Parameters  
 Date\_ 20130912  
 Time 20.57  
 INSTRUM spect  
 PROBHD 5 mm PABBO BB/  
 PULPROG zg30  
 TD 32768  
 SOLVENT CDCl3  
 NS 40  
 DS 2  
 SMH 8223.685 Hz  
 FIBRES 0.250967 Hz  
 AQ 1.9923444 sec  
 RG 87.66  
 DW 60.800 usec  
 DE 6.50 usec  
 TE 273.2 K  
 D1 1.0000000 sec  
 TDO 1

CHANNEL f1  
 NUC1 1H  
 P1 14.75 usec  
 PLW1 11.9949989 W  
 SFO1 400.1524711 MHz  
 F2 - Processing Parameters  
 SI 16384  
 SF 400.1500000 MHz  
 WDW EM  
 SSB 0  
 LB 0.30 Hz  
 GB 0  
 PC 1.00

190 180 170 160 150 140 130 120 110 100 90 80 70 60 50 40 30 20 10 ppm

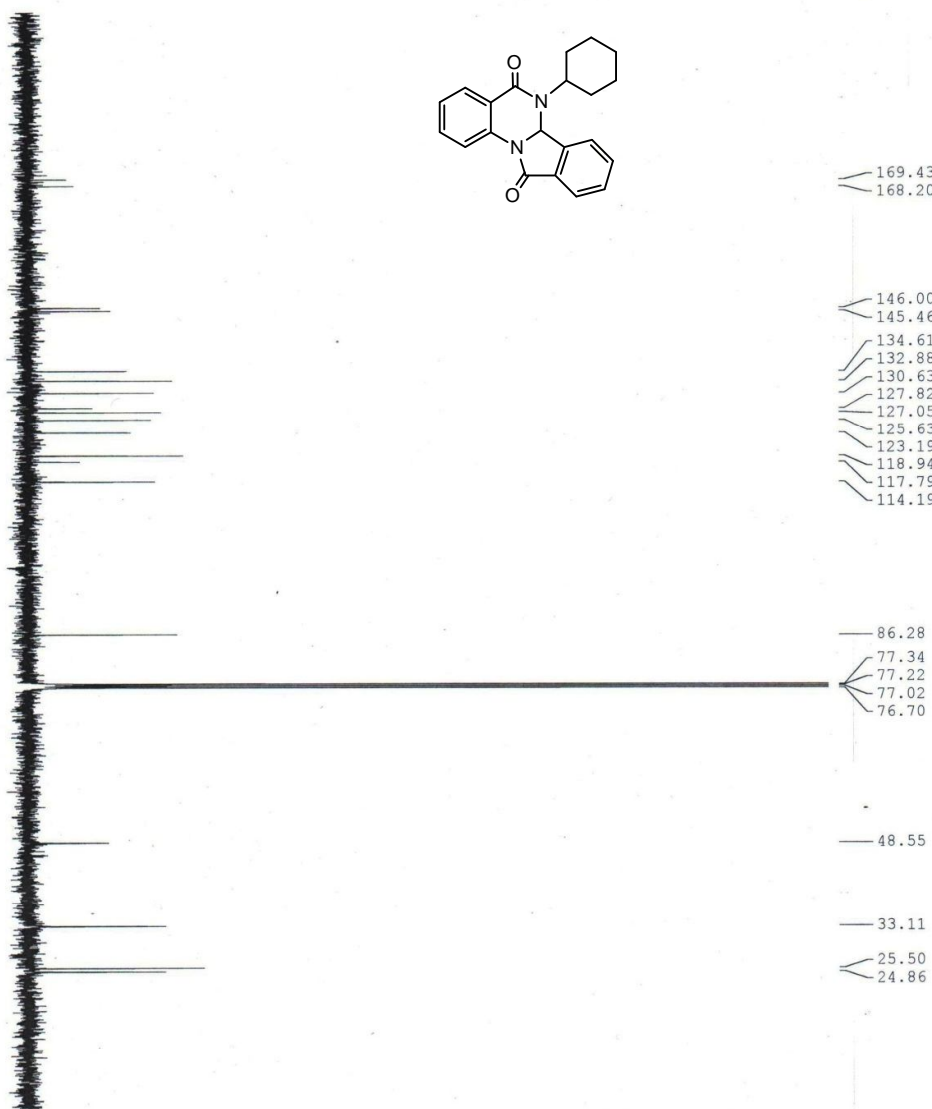

13C OF VBSS-637 41

169.43  
168.20  
146.00  
145.46  
134.61  
132.88  
130.63  
127.82  
127.05  
125.63  
123.19  
118.94  
117.79  
114.19

86.28  
77.34  
77.22  
77.02  
76.70

48.55  
33.11  
25.50  
24.86

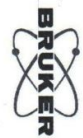

Current Data Parameters  
 NAME Dr. A HAMRA  
 EXPNO 223  
 PROCNO 1

F2 - Acquisition Parameters  
 Date\_ 20131001  
 Time 17.40

INSTRUM spect  
 PULPROG zgpg30  
 TD 32768  
 SOLVENT CDCl3  
 NS 800  
 DS 2  
 SWH 24038.461 Hz  
 FWHM 0.73149 Hz  
 AQ 0.616244 sec  
 RG 87.66  
 DW 20.800 usec  
 DE 6.50 usec  
 TE 297.9 K  
 D1 2.0000000 sec  
 D11 0.0300000 sec  
 TDO 1

CHANNEL F1  
 NUQ1 13C  
 P1 8.90 usec  
 PL1 54.0000000 W  
 SFO1 100.6278588 MHz

CHANNEL F2  
 waltz16  
 CPDPRG2  
 NUC2 1H  
 NOC2 80 usec  
 FREQ2 400.1516006 MHz  
 PLM12 0.40792999 W  
 PLM13 0.26107001 W  
 SFO2 400.1516006 MHz

F2 - Processing parameters  
 SI 32768  
 SF 100.6177980 MHz  
 WDM EM  
 SSB 0  
 LB 1.00 Hz  
 GB 0  
 FC 1.40

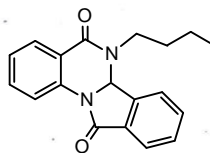

1H of VBSS-552

8.140  
8.117  
8.092  
8.072  
8.039  
8.021  
7.740  
7.725  
7.722  
7.706  
7.698  
7.680  
7.674  
7.658  
7.637  
7.615  
7.595  
7.340  
7.338  
7.321  
7.319  
7.302  
7.300  
7.281  
6.230

3.922  
3.900  
3.875  
3.861  
3.733  
3.719  
3.672

1.592  
1.579  
1.567  
1.505  
1.475  
1.462  
1.372  
1.353  
1.335  
1.317  
0.942  
0.923  
0.905

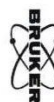

Current Data Parameters  
 NAME Dr. A MAJEE  
 EXPNO 32  
 PROCNO 1

F2 - Acquisition Parameters

Date\_ 20130115  
 Time 12:41  
 INSTRUM spect  
 PROBRD 5 mm PABBO BB/  
 PULPROG zg30  
 TD 32768  
 SOLVENT CDCl3  
 NS 32  
 DS 2  
 SWH 8223.685 Hz  
 FIDRES 0.250967 Hz  
 AQ 1.922948 sec  
 RG 655  
 DW 60.800 usec  
 DE 6.50 usec  
 TE 294.8 K  
 D1 1.00000000 sec  
 TDO 1

===== CHANNEL f1 =====

NUC1 1H  
 P1 14.71 usec  
 PL1 0.00 dB  
 SFO1 400.1524711 MHz

F2 - Processing parameters

SI 16384  
 SF 400.1500000 MHz  
 WDW EM  
 SSB 0  
 LB 0.30 Hz  
 GB 0  
 FC 1.00

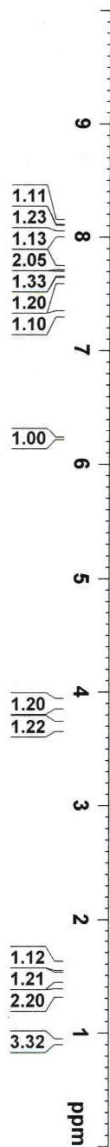

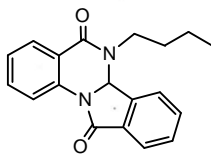

13C of VBSS-552

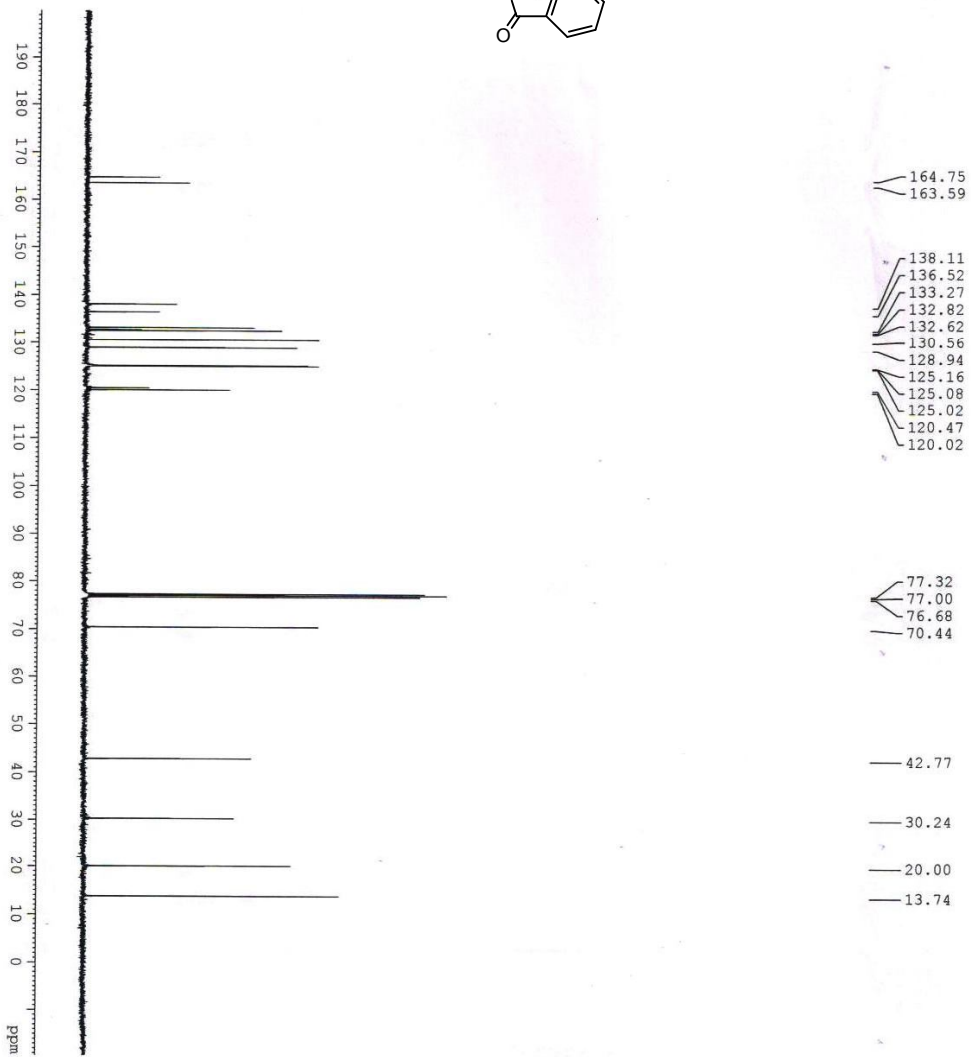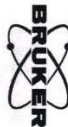

Current Data Parameters  
 NAME Dr. A MAJEE  
 EXPRNO 35  
 PROCNO 1

F2 - Acquisition Parameters  
 Date\_ 20130116  
 Time 16.52

PROBHD 5 mm BBBO  
 PULPROG zgpg30  
 TD 32768  
 SOLVENT CDCl3  
 NS 320  
 DS 4

SWH 24036.461 Hz  
 FIDRES 0.733596 Hz  
 AQ 0.6816244 sec  
 RG 57.28  
 DM 20.450 usec  
 DE 295.8 Ksec  
 TE 295.8 Ksec  
 D1 2.00000000 sec  
 D11 0.03000000 sec  
 TDO 1

CHANNEL F1  
 NUC1 13C  
 P1 8.90 usec  
 PL1 54.00000000 W  
 SFO1 100.6276989 MHz

CHANNEL F2  
 NUC2 1H  
 P2 90.10 usec  
 PL2 12.00000000 W  
 PLW2 0.40792999 W  
 PLW3 0.26107001 W  
 SFO2 400.1516005 MHz

F2 - Processing parameters  
 SI 16384  
 SF 100.6178055 MHz  
 WDW EM  
 SSB 0  
 GB 1.00 Hz  
 PC 1.40

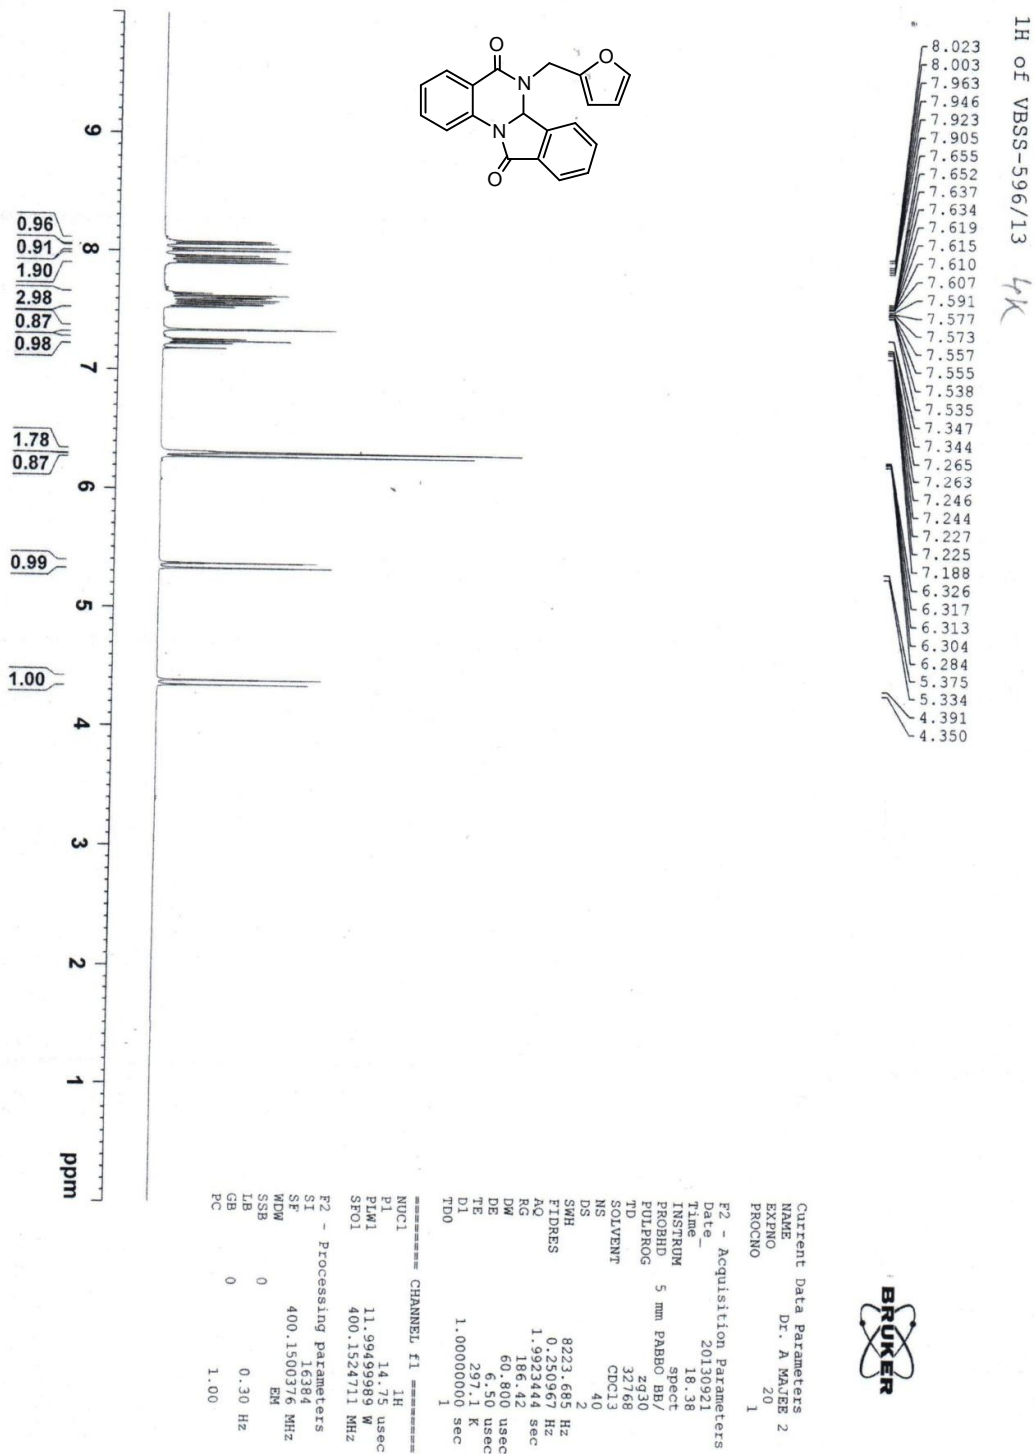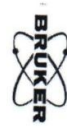

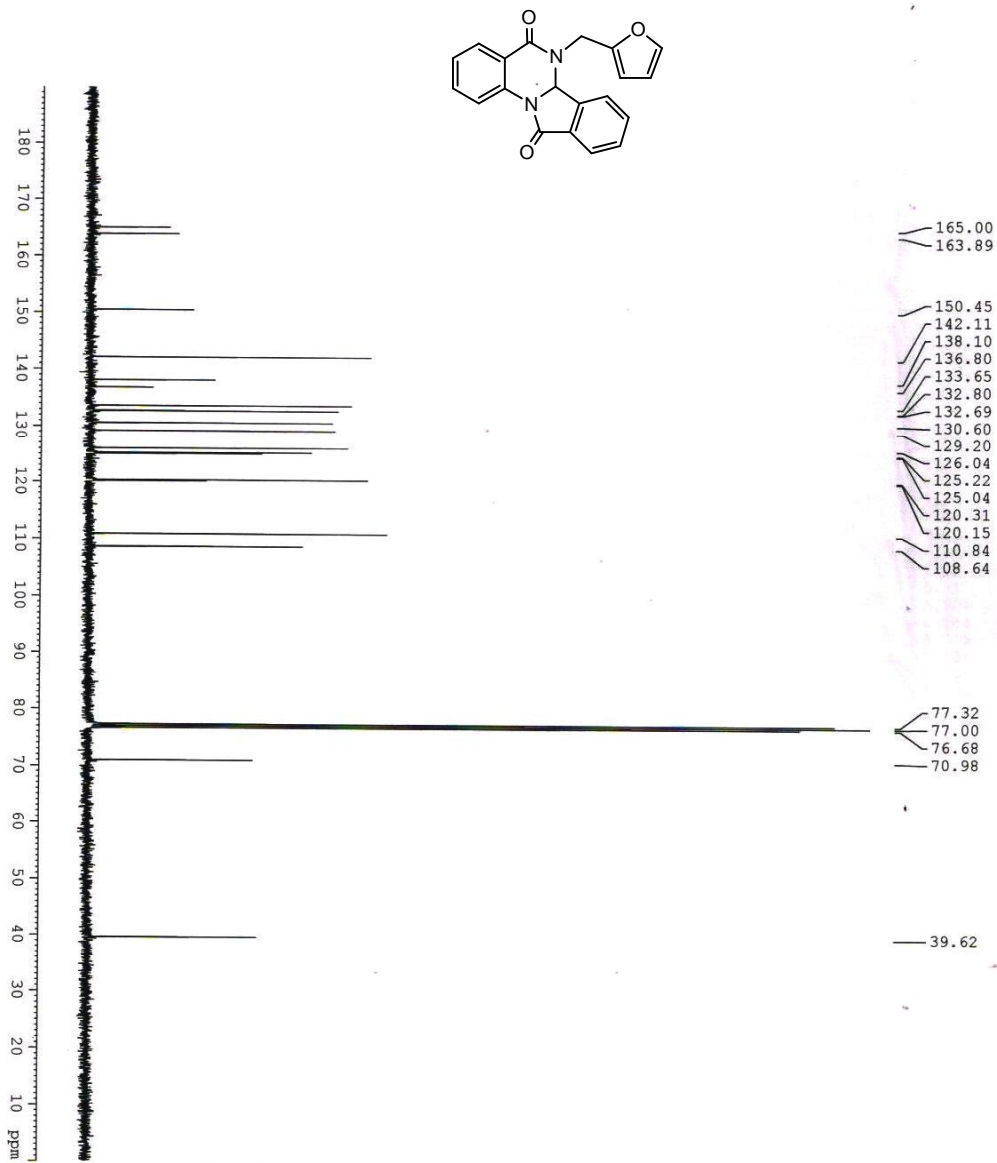

13C of VBSS-596/13

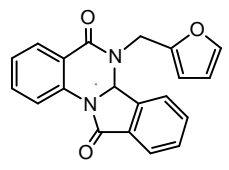

- 165.00
- 163.89
- 150.45
- 142.11
- 138.10
- 136.80
- 133.65
- 132.80
- 132.69
- 130.60
- 129.20
- 126.04
- 125.22
- 125.04
- 120.31
- 120.15
- 110.84
- 108.64

- 77.32
- 77.00
- 76.68
- 70.98

39.62

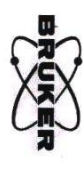

Current Data Parameters  
 NAME Dr. A KAJAR  
 EXPNO 506  
 PROCNO 1

F2 - Acquisition Parameters  
 Date\_ 2013.04  
 Time 19.04  
 INSTRUM spect  
 PROBRD 5 mm PABBO BB/  
 PULPROG zgpg30  
 TD 32768  
 SFO2 125.762  
 SOLVENT CDCl3  
 NS 512  
 DS 2  
 SMH 24038.461 Hz  
 FIDRES 0.733596 Hz  
 AQ 0.6816244 sec  
 DE 20.800 usec  
 TE 298.3 K  
 D1 2.00000000 sec  
 D11 0.03000000 sec  
 D10 1

CHANNEL F1  
 NUC1 13C  
 P1 8.90 usec  
 F1M1 54.0000000 W  
 SFO1 100.6218388 MHz

CHANNEL F2  
 waltz16  
 NUC2 1H  
 P2 12.0000000 usec  
 F2M2 0.0000000 W  
 F2M12 0.4079299 W  
 PLM13 0.26107001 W  
 SFO2 400.1516006 MHz

F2 - Processing parameters  
 S 1  
 SF 100.6178012 MHz  
 WDW EM  
 SSB 0  
 LB 1.00 Hz  
 GB 0  
 PC 1.40
